# Supplementary material for: Dynamic anoxic ferruginous conditions during the end-Permian mass extinction and recovery
Source: PubMed Central journal article supplement (PMC4960316; doi:10.1038/ncomms12236), 2016-07-19
Supplement: ncomms12236-s1.pdf [file ncomms12236-s1.pdf]

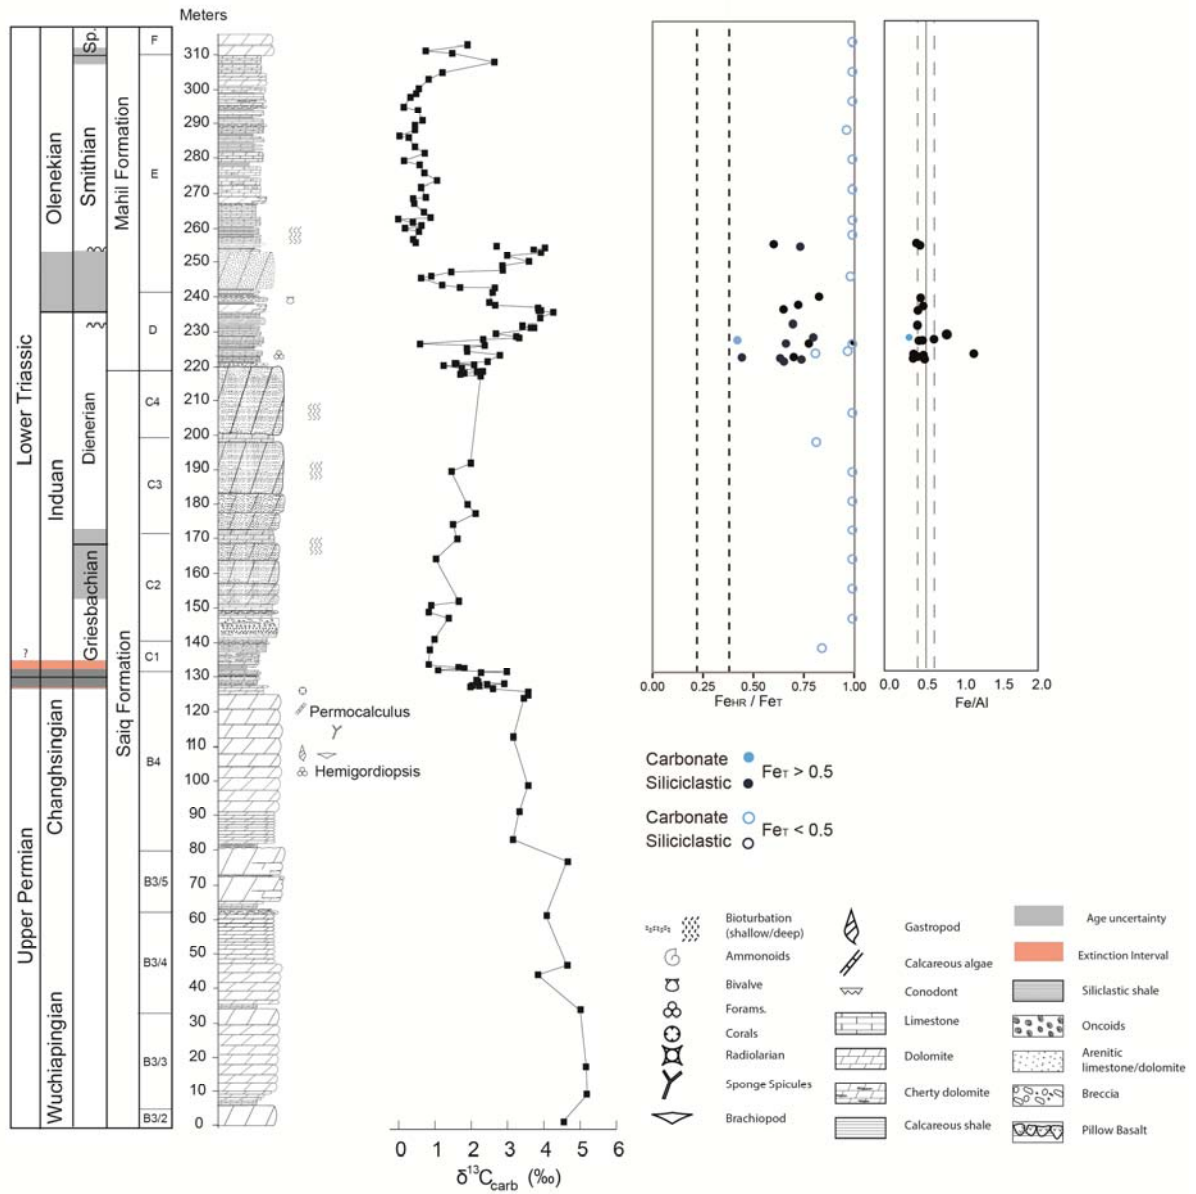

**Supplementary Fig. 1 – Distal Platform Site 1, Saiq Plateau.**  
 Stratigraphy and  $\delta^{13}C$  from the equivalent Wadi Sahtan section<sup>1</sup> that is well-correlated with the Saiq Plateau. Includes key for all sections.

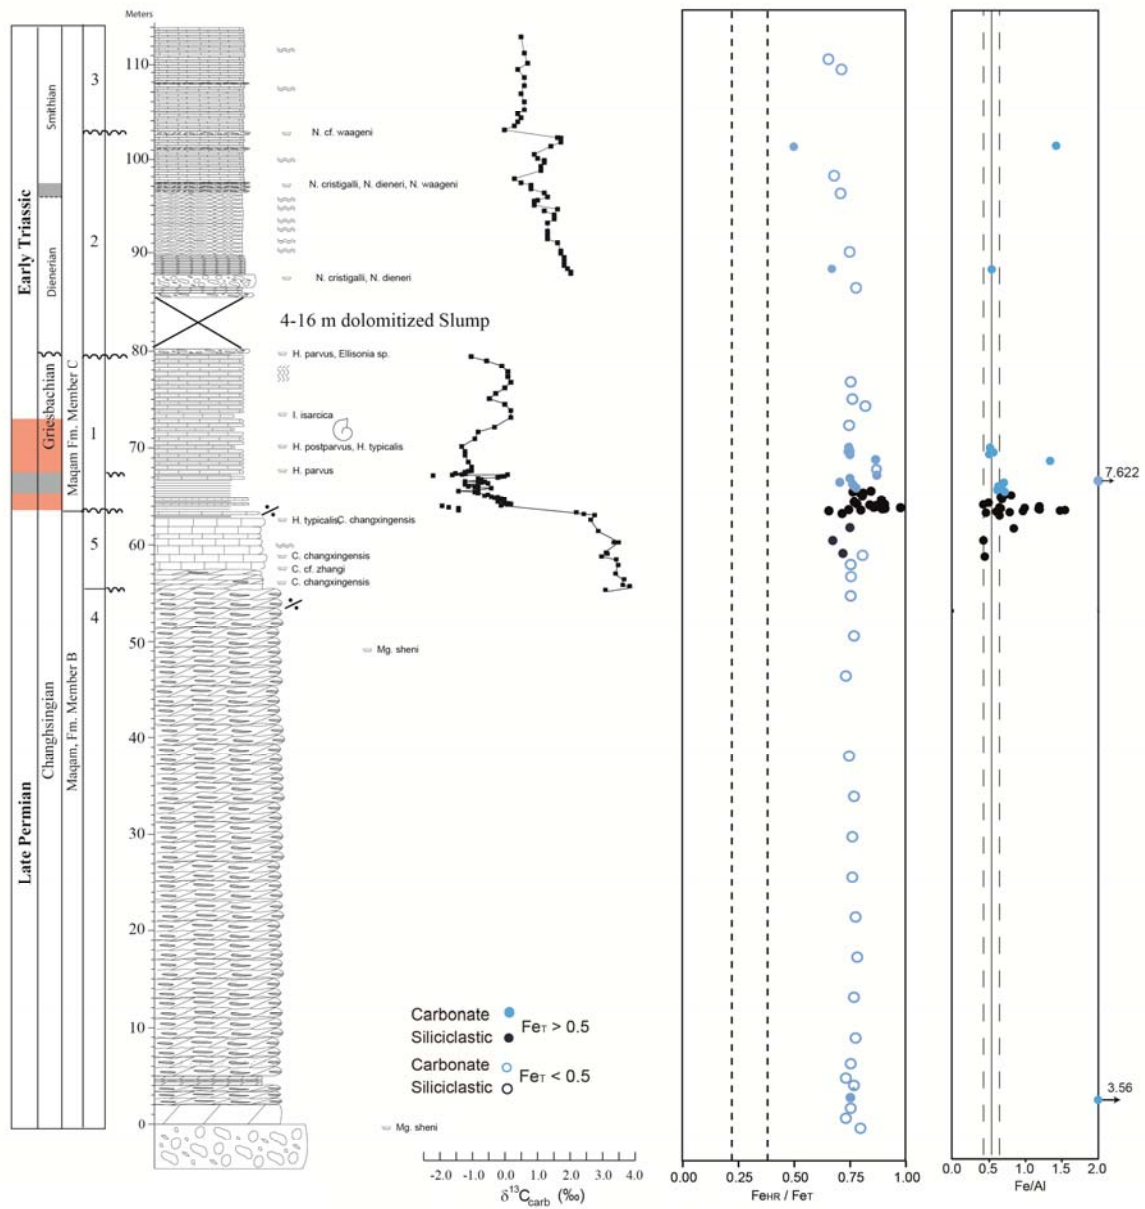

✂ This is a composite section, this sign indicate a change of sections

**Supplementary Fig. 2- Mid-slope Site 3. Sumeini Group, Wadi Maqam.**  
 Stratigraphy and  $\delta^{13}C$  from ref. [1]

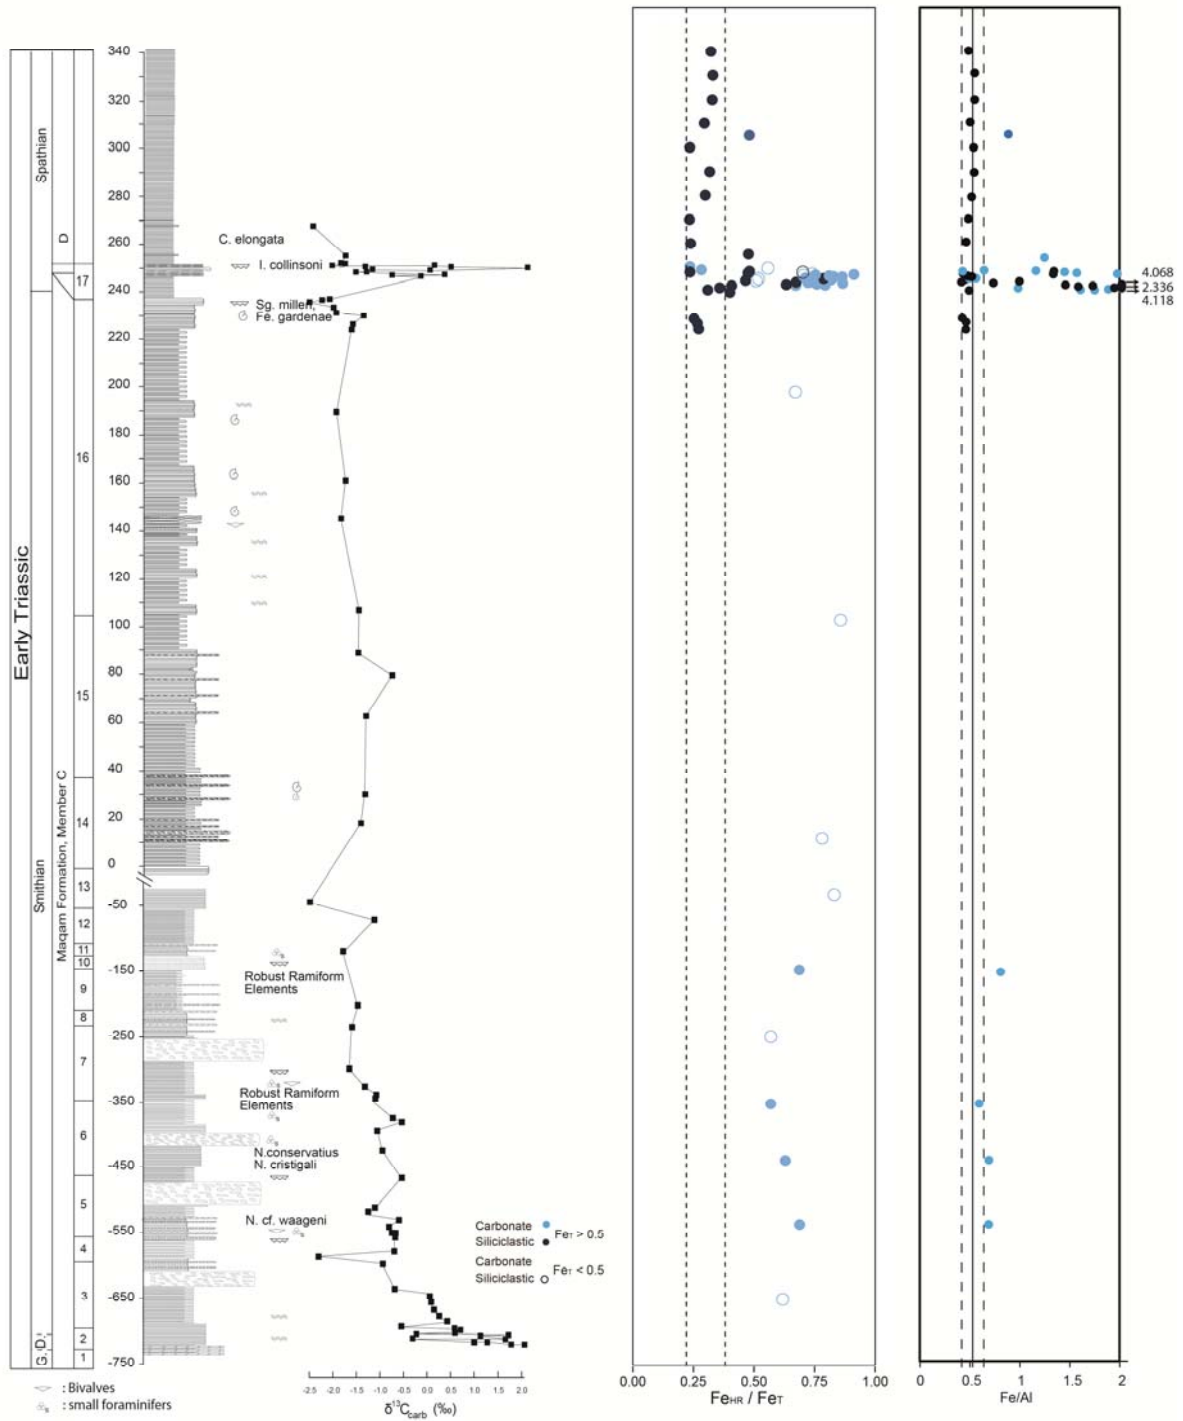

**Supplementary Fig. 3 – Mid-slope Site 3 continued. Sumeini Group, Wadi Shuyab. Stratigraphy and  $\delta^{13}\text{C}$  from ref [1]. Note change in scale below 0 m due to higher sedimentation rates in the Smithian.**

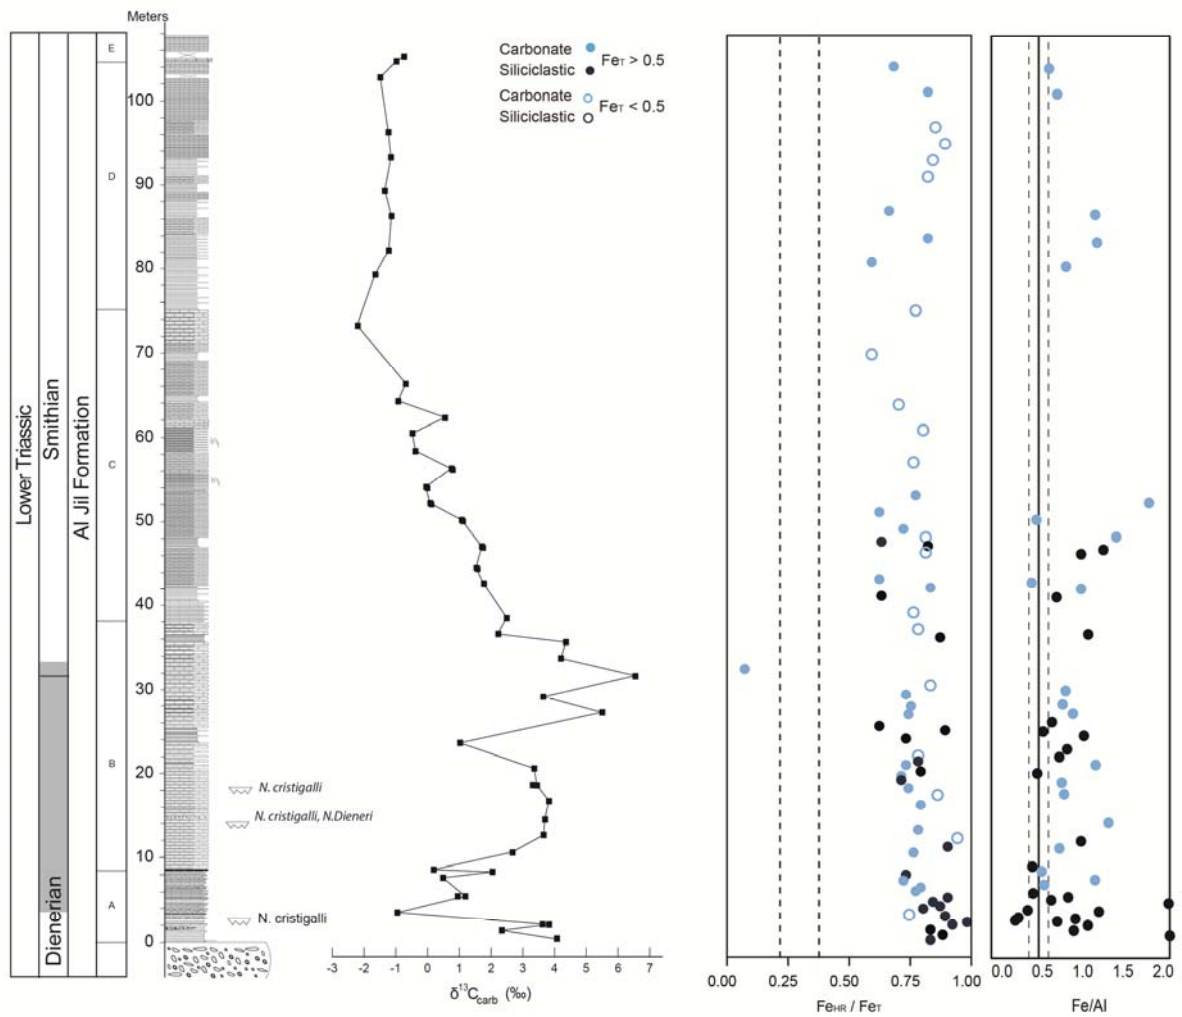

**Supplementary Fig. 4 – Distal slope Site 4. Wadi Wasit South.**  
 Stratigraphy and  $\delta^{13}\text{C}$  from ref [1].

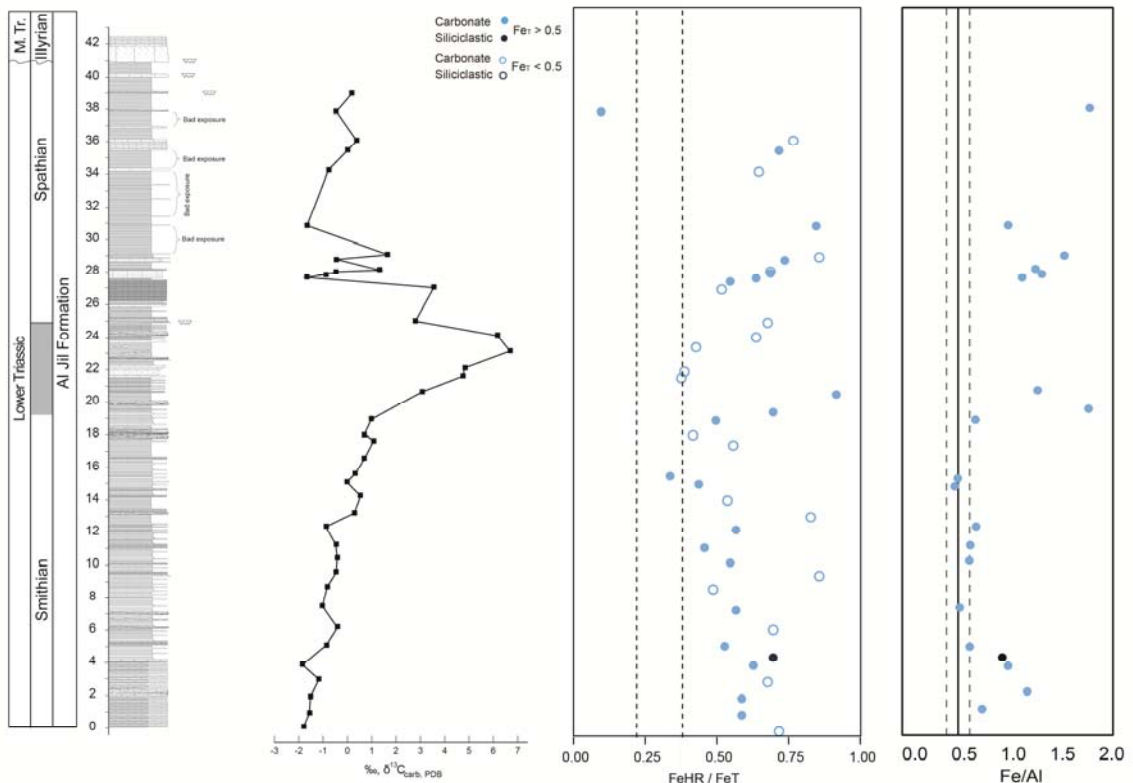

**Supplementary Fig. 5 – Distal slope Site 4 continued, Radio Tower.**  
 Stratigraphy and  $\delta^{13}C$  (this study).

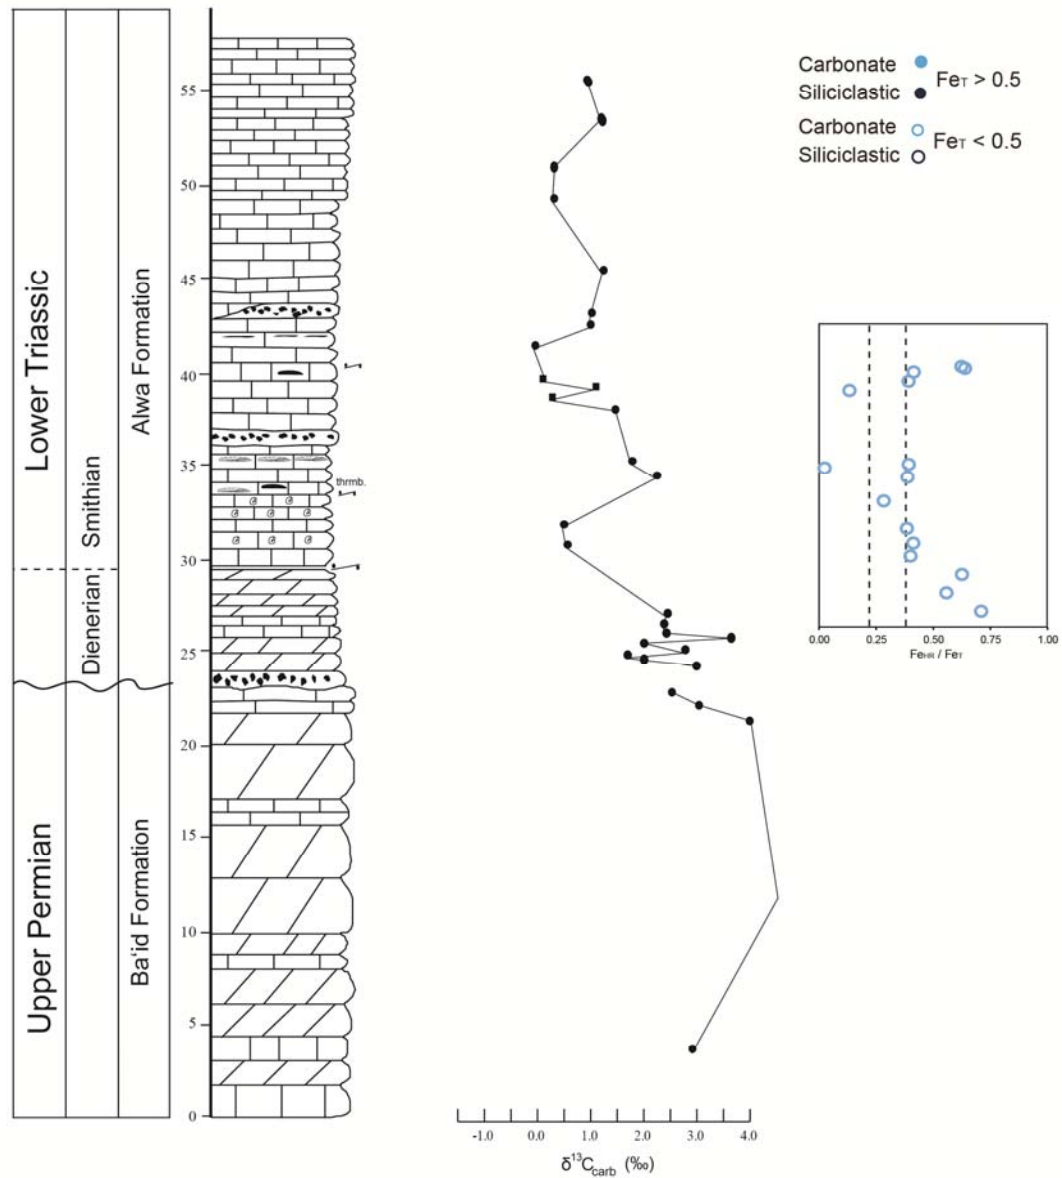

**Supplementary Fig. 6 – Isolated Seamount Site 5, Baid.**

Stratigraphy and  $\delta^{13}C$  [ref. 2]. A possible anoxic event is recorded in elevated  $Fe_{HR}/Fe_T$  ratios at the end of the Dienerian (which corresponds with anoxia recorded at the platform site). However, low  $Fe_T$  values preclude the use of Fe-speciation for this site. The carbonate fabrics during this interval are, however, consistent with the reconstructed anoxic wedge scenario.

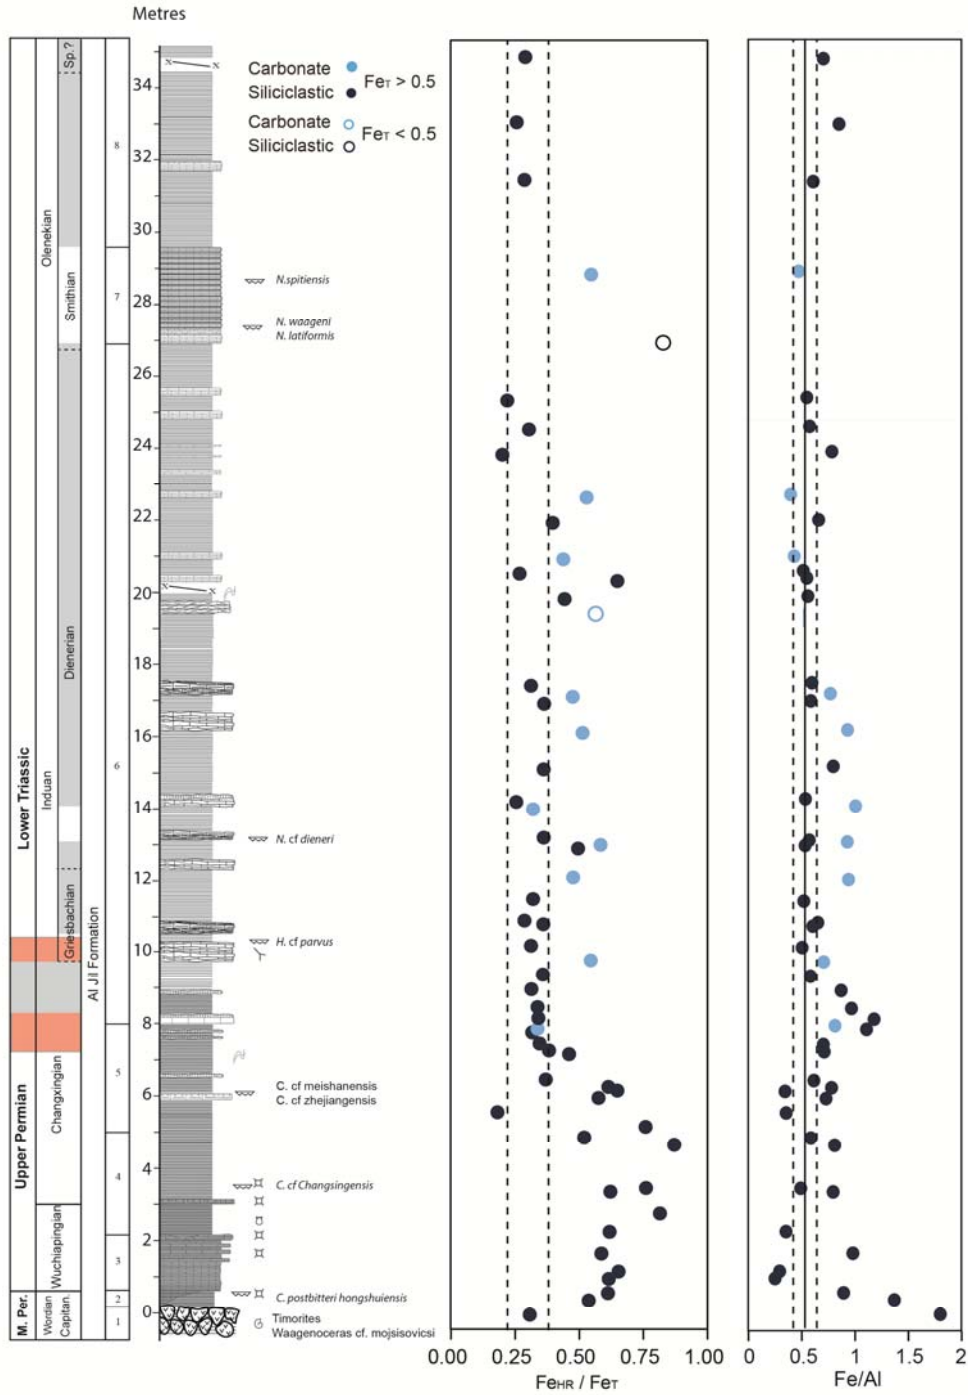

**Supplementary Fig 7: Deep Basin Site 6, Buday'ah.**

Stratigraphy modified from [3].

**Supplementary Table 1: Site 1, Distal Platform, Saiq Plateau. Heights refer to Supplementary Fig. 1. Fe data in wt%.**

| Height<br>(m) | Locality | Number | Lith          | Fe <sub>T</sub> | Fe <sub>Carb</sub> | Fe <sub>Ox</sub> | Fe <sub>Mag</sub> | Fe <sub>Py</sub> | Fe <sub>HR</sub> /Fe <sub>T</sub> | Fe <sub>Py</sub> /Fe <sub>HR</sub> | Fe/Al |
|---------------|----------|--------|---------------|-----------------|--------------------|------------------|-------------------|------------------|-----------------------------------|------------------------------------|-------|
| 140           | SQD      | 1      | Carbonate     | 0.090           | 0.018              | 0.041            | 0.012             | 0.002            | 0.840                             | 0.033                              |       |
| 145           | SQD      | 2      | Carbonate     | 0.060           | 0.018              | 0.043            | 0.016             | 0.002            | 1.270                             | 0.023                              |       |
| 155           | SQD      | 3      | Carbonate     | 0.050           | 0.015              | 0.024            | 0.009             | 0.002            | 1.020                             | 0.031                              |       |
| 165           | SQD      | 4      | Carbonate     | 0.030           | 0.013              | 0.018            | 0.010             | 0.002            | 1.430                             | 0.047                              |       |
| 170           | SQD      | 5      | Carbonate     | 0.050           | 0.021              | 0.017            | 0.010             | 0.001            | 1.080                             | 0.048                              |       |
| 180           | SQD      | 6      | Carbonate     | 0.030           | 0.020              | 0.016            | 0.014             | 0.002            | 1.760                             | 0.011                              |       |
| 190           | SQD      | 7      | Carbonate     | 0.040           | 0.016              | 0.021            | 0.013             | 0.001            | 1.340                             | 0.040                              |       |
| 200           | SQD      | 8      | Carbonate     | 0.040           | 0.000              | 0.013            | 0.017             | 0.001            | 0.810                             | 0.015                              |       |
| 210           | SQD      | 9      | Carbonate     | 0.030           | 0.040              | 0.014            | 0.017             | 0.000            | 2.140                             | 0.022                              |       |
| 220           | SAIQ1    | 1      | Carbonate     | 0.516           | 0.134              | 0.259            | 0.000             | 0.023            | 0.805                             | 0.055                              | 0.513 |
| 220.25        | SAIQ1    | 2      | Siliciclastic | 1.362           | 0.043              | 0.824            | 0.012             | 0.013            | 0.656                             | 0.018                              | 0.360 |
| 220.75        | SAIQ1    | 3      | Carbonate     | 0.455           | 0.140              | 0.290            | 0.000             | 0.011            | 0.976                             | 0.034                              |       |
| 220.85        | SAIQ1    | 4      | Siliciclastic | 0.816           | 0.068              | 0.518            | 0.006             | 0.016            | 0.745                             | 0.026                              | 0.423 |
| 221.35        | SAIQ1    | 5      | Siliciclastic | 3.165           | 0.036              | 1.912            | 0.061             | 0.011            | 0.638                             | 0.006                              | 0.497 |
| 221.75        | SAIQ1    | 6      | Siliciclastic | 0.967           | 0.035              | 0.630            | 0.011             | 0.007            | 0.706                             | 0.010                              | 0.366 |
| 221.85        | SAIQ1    | 7      | Siliciclastic | 3.344           | 0.007              | 1.452            | 0.041             | 0.002            | 0.449                             | 0.001                              | 1.168 |
| 224.35        | SAIQ1    | 8      | Carbonate     | 0.147           | 0.099              | 0.046            | 0.000             | 0.004            | 1.015                             | 0.035                              |       |
| 226.25        | SAIQ1    | 9      | Siliciclastic | 1.551           | 0.632              | 0.065            | 0.003             | 0.508            | 0.780                             | 0.422                              | 0.436 |
| 226.35        | SAIQ1    | 10     | Siliciclastic | 2.253           | 0.071              | 1.396            | 0.026             | 0.010            | 0.668                             | 0.008                              | 0.486 |
| 226.75        | SAIQ1    | 11     | Siliciclastic | 0.977           | 0.155              | 0.608            | 0.000             | 0.220            | 1.007                             | 0.225                              | 0.637 |
| 227.35        | SAIQ1    | 12     | Carbonate     | 2.749           | 0.000              | 1.127            | 0.047             | 0.001            | 0.427                             | 0.001                              | 0.306 |
| 228.35        | SAIQ1    | 13     | Siliciclastic | 0.762           | 0.164              | 0.349            | 0.005             | 0.086            | 0.802                             | 0.152                              | 0.808 |
| 231.35        | SAIQ1    | 14     | Siliciclastic | 2.439           | 0.107              | 1.522            | 0.027             | 0.053            | 0.701                             | 0.032                              | 0.417 |
| 234.75        | SAIQ1    | 15     | Siliciclastic | 1.692           | 0.210              | 1.045            | 0.009             | <0.001           | 0.655                             | 0.000                              | 0.423 |
| 236.25        | SAIQ1    | 16     | Siliciclastic | 1.261           | 0.290              | 0.673            | 0.000             | <0.001           | 0.728                             | 0.000                              | 0.493 |
| 239           | SAIQ1    | 17     | Siliciclastic | 1.538           | 0.272              | 0.775            | 0.006             | 0.226            | 0.831                             | 0.177                              | 0.460 |
| 241.5         | SQA      | 34     | Siliciclastic | 0.100           | 0.034              | 0.050            | 0.010             | 0.003            | 0.990                             | 0.032                              |       |
| 254.5         | SAIQ1    | 18     | Siliciclastic | 0.876           | 0.079              | 0.551            | 0.003             | 0.015            | 0.739                             | 0.023                              | 0.452 |
| 255.25        | SAIQ1    | 19     | Siliciclastic | 1.235           | 0.050              | 0.726            | 0.005             | <0.001           | 0.606                             | 0.000                              | 0.404 |



|        |       |    |           |       |       |       |       |        |       |       |
|--------|-------|----|-----------|-------|-------|-------|-------|--------|-------|-------|
| 256.25 | SAIQ1 | 20 | Carbonate | 0.126 | 0.146 | 0.225 | 0.000 | <0.001 | 2.874 | 0.000 |
| 260    | SQB   | 1  | Carbonate | 0.110 | 0.054 | 0.040 | 0.012 | 0.006  | 1.040 | 0.053 |
| 270    | SAIQ1 | 21 | Carbonate | 0.412 | 0.108 | 0.188 | 0.000 | 0.006  | 0.730 | 0.019 |
| 280    | SQB   | 5  | Carbonate | 0.160 | 0.106 | 0.042 | 0.017 | 0.003  | 1.070 | 0.016 |
| 285    | SQB   | 6  | Carbonate | 0.100 | 0.063 | 0.023 | 0.011 | 0.002  | 1.000 | 0.017 |
| 295    | SQB   | 7  | Carbonate | 0.190 | 0.089 | 0.078 | 0.020 | 0.001  | 0.970 | 0.005 |
| 305    | SQB   | 8  | Carbonate | 0.160 | 0.103 | 0.042 | 0.014 | 0.003  | 1.040 | 0.019 |
| 310    | SQB   | 9  | Carbonate | 0.080 | 0.034 | 0.051 | 0.010 | 0.001  | 1.150 | 0.015 |
| 315    | SQB   | 11 | Carbonate | 0.060 | 0.042 | 0.017 | 0.011 | 0.002  | 1.200 | 0.033 |

**Supplementary Table 2: Site 2 mid slope lower, Wadi Maqam. Heights refer to Supplementary Fig. 2. Fe data in wt%.**

| Height (m) | Locality | Number | Lith.         | Fe data in wt%  |                    |                  |                   |                  |                                   |                                    | Fe/Al |
|------------|----------|--------|---------------|-----------------|--------------------|------------------|-------------------|------------------|-----------------------------------|------------------------------------|-------|
|            |          |        |               | Fe <sub>T</sub> | Fe <sub>Carb</sub> | Fe <sub>Ox</sub> | Fe <sub>Mag</sub> | Fe <sub>Py</sub> | Fe <sub>HR</sub> /Fe <sub>T</sub> | Fe <sub>Py</sub> /Fe <sub>HR</sub> |       |
| 0          | OMO13    | 46     | Carbonate     | 0.090           | 0.019              | 0.053            | 0.005             | <0.001           | 0.880                             | 0.000                              |       |
| 1          | OMO13    | 47     | Carbonate     | 0.060           | 0.014              | 0.030            | 0.008             | <0.001           | 0.900                             | 0.000                              |       |
| 2          | OMO13    | 48     | Carbonate     | 0.060           | 0.009              | 0.030            | 0.003             | <0.001           | 0.690                             | 0.000                              |       |
| 3.4        | OMO13    | 51     | Carbonate     | 0.420           | 0.030              | 0.052            | 0.007             | 0.001            | 0.710                             | 0.007                              |       |
| 3.7        | OMO13    | 50     | Carbonate     | 2.040           | 0.009              | 1.539            | 0.018             | 0.000            | 0.770                             | 0.000                              | 3.56  |
| 4          | OMO13    | 49     | Carbonate     | 0.110           | 0.020              | 0.262            | 0.013             | 0.002            | 0.780                             | 0.011                              |       |
| 5          | OMO13    | 52     | Carbonate     | 0.150           | 0.009              | 0.102            | 0.008             | 0.000            | 0.710                             | 0.000                              |       |
| 6          | OMO13    | 53     | Carbonate     | 0.120           | 0.016              | 0.066            | 0.007             | 0.003            | 0.760                             | 0.033                              |       |
| 9          | OMO13    | 54     | Carbonate     | 0.160           | 0.008              | 0.117            | 0.006             | 0.002            | 0.820                             | 0.015                              |       |
| 13         | OMO13    | 55     | Carbonate     | 0.080           | 0.005              | 0.056            | 0.005             | 0.001            | 0.840                             | 0.015                              |       |
| 17         | OMO13    | 56     | Carbonate     | 0.150           | 0.040              | 0.077            | 0.007             | 0.001            | 0.860                             | 0.008                              |       |
| 21         | OMO13    | 57     | Carbonate     | 0.050           | 0.000              | 0.035            | 0.006             | 0.001            | 0.830                             | 0.024                              |       |
| 25         | OMO13    | 58     | Carbonate     | 0.130           | 0.000              | 0.096            | 0.009             | 0.001            | 0.790                             | 0.010                              |       |
| 29         | OMO13    | 59     | Carbonate     | 0.130           | 0.002              | 0.090            | 0.009             | 0.001            | 0.790                             | 0.010                              |       |
| 33         | OMO13    | 60     | Carbonate     | 0.100           | 0.000              | 0.074            | 0.004             | 0.001            | 0.800                             | 0.013                              |       |
| 37         | OMO13    | 61     | Carbonate     | 0.100           | 0.000              | 0.065            | 0.007             | 0.001            | 0.730                             | 0.014                              |       |
| 42         | OMO13    | 62     | Carbonate     | 0.170           | 0.005              | 0.108            | 0.004             | 0.001            | 0.710                             | 0.008                              |       |
| 45         | OMO13    | 63     | Carbonate     | 0.120           | 0.006              | 0.074            | 0.005             | 0.001            | 0.690                             | 0.012                              |       |
| 49         | OMO13    | 64     | Carbonate     | 0.090           | 0.027              | 0.038            | 0.004             | 0.001            | 0.810                             | 0.014                              |       |
| 53         | OMO13    | 65     | Carbonate     | 0.100           | 0.010              | 0.060            | 0.006             | <0.001           | 0.740                             | 0.000                              |       |
| 55.2       | Maqam    | A8     | Carbonate     | 0.280           | 0.067              | 0.133            | 0.014             | <0.001           | 0.770                             | 0.000                              |       |
| 56.1       | OMO      | 83     | Carbonate     | 0.160           | 0.023              | 0.081            | 0.015             | 0.001            | 0.750                             | 0.008                              |       |
| 57.3       | Maqam    | A7     | Carbonate     | 0.270           | 0.071              | 0.139            | 0.020             | 0.002            | 0.860                             | 0.009                              |       |
| 58         | MAQ1     | 1      | Siliciclastic | 0.646           | 0.023              | 0.433            | 0.009             | 0.002            | 0.722                             | 0.004                              | 0.444 |
| 59.3       | MAQ1     | 2      | Siliciclastic | 0.751           | 0.022              | 0.473            | 0.011             | 0.003            | 0.677                             | 0.006                              | 0.426 |
| 60.6       | MAQ1     | 3      | Siliciclastic | 0.895           | 0.097              | 0.540            | 0.035             | 0.003            | 0.754                             | 0.004                              | 0.845 |
| 62         | MAQ1     | 4      | Siliciclastic | 1.348           | 0.075              | 0.880            | 0.012             | 0.002            | 0.719                             | 0.002                              | 0.648 |

|       |       |     |               |       |       |       |       |        |       |       |       |
|-------|-------|-----|---------------|-------|-------|-------|-------|--------|-------|-------|-------|
| 62.3  | MAQ1  | 5   | Siliciclastic | 3.507 | 0.088 | 2.162 | 0.060 | 0.001  | 0.659 | 0.000 | 0.461 |
| 62.36 | MAQ1  | 6   | Siliciclastic | 3.865 | 0.129 | 2.844 | 0.130 | <0.001 | 0.803 | 0.000 | 0.788 |
| 62.42 | MAQ1  | 7   | Siliciclastic | 3.745 | 0.105 | 2.646 | 0.052 | <0.001 | 0.749 | 0.000 | 0.603 |
| 62.48 | MAQ1  | 8   | Siliciclastic | 3.178 | 1.242 | 1.567 | 0.047 | <0.001 | 0.899 | 0.000 | 0.971 |
| 62.53 | MAQ1  | 9   | Siliciclastic | 2.692 | 1.462 | 0.961 | 0.030 | <0.001 | 0.911 | 0.000 | 1.482 |
| 62.59 | MAQ1  | 10  | Siliciclastic | 2.391 | 1.406 | 0.926 | 0.012 | <0.001 | 0.980 | 0.000 | 1.551 |
| 62.65 | MAQ1  | 11  | Siliciclastic | 2.815 | 1.229 | 1.154 | 0.036 | <0.001 | 0.859 | 0.000 | 1.201 |
| 62.71 | MAQ1  | 12  | Siliciclastic | 2.693 | 1.381 | 0.925 | 0.041 | 0.001  | 0.872 | 0.000 | 1.187 |
| 62.77 | MAQ1  | 13  | Siliciclastic | 2.626 | 0.641 | 1.580 | 0.045 | 0.000  | 0.863 | 0.000 | 0.666 |
| 62.83 | MAQ1  | 14  | Siliciclastic | 2.179 | 1.121 | 0.759 | 0.023 | 0.001  | 0.873 | 0.001 | 0.995 |
| 62.88 | MAQ1  | 15  | Siliciclastic | 2.039 | 0.906 | 0.792 | 0.021 | 0.001  | 0.843 | 0.001 | 0.647 |
| 62.94 | MAQ1  | 16  | Siliciclastic | 1.979 | 1.017 | 0.749 | 0.031 | 0.002  | 0.909 | 0.001 | 1.193 |
| 63    | MAQ1  | 17  | Siliciclastic | 2.694 | 0.409 | 1.635 | 0.071 | 0.001  | 0.786 | 0.000 | 1.199 |
| 63.2  | MAQ1  | 18  | Siliciclastic | 0.966 | 0.353 | 0.387 | 0.006 | 0.001  | 0.773 | 0.001 | 0.424 |
| 63.4  | MAQ1  | 19  | Siliciclastic | 0.951 | 0.336 | 0.499 | 0.015 | 0.002  | 0.896 | 0.002 | 0.497 |
| 63.8  | MAQ1  | 20  | Siliciclastic | 1.693 | 0.327 | 1.019 | 0.025 | <0.001 | 0.810 | 0.000 | 0.683 |
| 64    | MAQ1  | 21  | Siliciclastic | 1.990 | 0.248 | 1.306 | 0.042 | 0.001  | 0.803 | 0.001 | 0.664 |
| 64.1  | MAQ1  | 22  | Siliciclastic | 2.089 | 0.576 | 1.096 | 0.027 | <0.001 | 0.813 | 0.000 | 0.692 |
| 64.2  | MAQ1  | 23  | Siliciclastic | 2.353 | 0.578 | 1.180 | 0.046 | <0.001 | 0.767 | 0.000 | 0.809 |
| 64.3  | MAQ1  | 24  | Siliciclastic | 1.546 | 0.572 | 0.719 | 0.019 | <0.001 | 0.848 | 0.000 | 0.737 |
| 64.6  | MAQ1  | 25  | Carbonate     | 1.639 | 0.403 | 0.845 | 0.031 | 0.002  | 0.782 | 0.002 | 0.720 |
| 64.8  | MAQ1  | 26  | Carbonate     | 1.630 | 0.355 | 0.866 | 0.036 | 0.001  | 0.772 | 0.001 | 0.616 |
| 65    | MAQ1  | 27  | Carbonate     | 1.729 | 0.422 | 0.861 | 0.038 | 0.001  | 0.765 | 0.001 | 0.675 |
| 65.2  | MAQ1  | 28  | Carbonate     | 2.451 | 0.381 | 1.324 | 0.030 | 0.001  | 0.708 | 0.001 | 0.631 |
| 65.6  | MAQ1  | 29  | Carbonate     | 2.195 | 0.196 | 1.374 | 0.079 | 0.004  | 0.753 | 0.002 | 0.708 |
| 65.9  | MAQ1  | 30  | Carbonate     | 0.562 | 0.447 | 0.037 | 0.000 | 0.007  | 0.873 | 0.014 | 7.622 |
| 66.2  | MAQ1  | 31  | Carbonate     | 0.393 | 0.079 | 0.264 | 0.001 | 0.001  | 0.881 | 0.003 |       |
| 67.5  | MAQ1  | 32  | Carbonate     | 0.716 | 0.411 | 0.208 | 0.000 | 0.003  | 0.869 | 0.005 | 1.346 |
| 68    | MAQ1  | 33  | Carbonate     | 0.792 | 0.126 | 0.465 | 0.003 | 0.003  | 0.753 | 0.005 | 0.505 |
| 68.2  | MAQ1  | 34  | Carbonate     | 0.308 | 0.084 | 0.149 | 0.000 | <0.001 | 0.756 | 0.000 | 0.564 |
| 68.7  | MAQ1  | 35  | Carbonate     | 1.213 | 0.239 | 0.646 | 0.020 | 0.003  | 0.748 | 0.003 | 0.516 |
| 74.1  | Maqam | 273 | Carbonate     | 0.110 | 0.001 | 0.083 | 0.015 | <0.001 | 0.900 | 0.000 |       |

|      |       |      |           |       |       |       |       |        |       |       |       |
|------|-------|------|-----------|-------|-------|-------|-------|--------|-------|-------|-------|
| 76   | Maqam | 277  | Carbonate | 0.110 | 0.003 | 0.065 | 0.015 | 0.001  | 0.740 | 0.012 |       |
| 76.7 | Maqam | 278B | Carbonate | 0.110 | 0.005 | 0.058 | 0.016 | <0.001 | 0.720 | 0.000 |       |
| 78.4 | Maqam | 281  | Carbonate | 0.060 | 0.002 | 0.025 | 0.011 | 0.001  | 0.700 | 0.026 |       |
| 81   | Maqam | 287  | Carbonate | 0.120 | 0.068 | 0.028 | 0.017 | <0.001 | 0.930 | 0.000 |       |
| 86   | OM08  | 30   | Carbonate | 0.420 | 0.033 | 0.265 | 0.019 | 0.001  | 0.770 | 0.003 |       |
| 88   | OM08  | 33   | Carbonate | 0.620 | 0.053 | 0.322 | 0.020 | 0.014  | 0.660 | 0.034 | 0.540 |
| 90   | OM08  | 38   | Carbonate | 0.390 | 0.054 | 0.203 | 0.019 | 0.015  | 0.740 | 0.052 |       |
| 96   | OM10  | 211  | Carbonate | 0.220 | 0.019 | 0.107 | 0.019 | 0.001  | 0.660 | 0.007 |       |
| 98   | OM10  | 216  | Carbonate | 0.320 | 0.016 | 0.187 | 0.019 | 0.001  | 0.700 | 0.004 |       |
| 102  | OM10  | 223  | Carbonate | 1.280 | 0.044 | 0.557 | 0.026 | 0.001  | 0.490 | 0.002 | 1.429 |
| 109  | OMO   | 107  | Carbonate | 0.370 | 0.131 | 0.058 | 0.019 | 0.001  | 0.710 | 0.002 |       |
| 110  | OM10  | 237  | Carbonate | 0.310 | 0.117 | 0.124 | 0.019 | <0.001 | 0.670 | 0.005 |       |

**Supplementary Table 3: Site 3 mid slope upper, Wadi Shuyab. Heights refer to Supplementary Fig. 3. Fe data in wt%.**

| Height<br>(m) | Locality | Number | Lith.         | Fe <sub>T</sub> | Fe <sub>Carb</sub> | Fe <sub>Ox</sub> | Fe <sub>Mag</sub> | Fe <sub>Pv</sub> | Fe <sub>HR</sub> /Fe <sub>T</sub> | Fe <sub>Pv</sub> /Fe <sub>HR</sub> | Fe/Al |
|---------------|----------|--------|---------------|-----------------|--------------------|------------------|-------------------|------------------|-----------------------------------|------------------------------------|-------|
| -650          | OMO      | 113    | Carbonate     | 0.330           | 0.128              | 0.055            | 0.021             | 0.001            | 0.620                             | 0.000                              |       |
| -550          | OMO      | 128    | Carbonate     | 0.610           | 0.309              | 0.081            | 0.024             | 0.001            | 0.690                             | 0.000                              | 0.686 |
| -450          | OMO      | 138    | Carbonate     | 0.560           | 0.265              | 0.062            | 0.026             | 0.001            | 0.630                             | 0.000                              | 0.688 |
| -350          | OMO      | 148    | Carbonate     | 0.560           | 0.226              | 0.069            | 0.024             | 0.001            | 0.570                             | 0.000                              | 0.589 |
| -250          | OMO      | 161    | Carbonate     | 0.360           | 0.083              | 0.100            | 0.021             | <0.001           | 0.570                             | 0.000                              |       |
| -150          | OMO      | 168    | Carbonate     | 0.690           | 0.339              | 0.104            | 0.030             | <0.001           | 0.690                             | 0.000                              | 0.807 |
| -50           | OMO      | 172A   | Carbonate     | 0.190           | 0.088              | 0.064            | 0.015             | <0.001           | 0.890                             | 0.000                              |       |
| 10            | OMO      | 177    | Carbonate     | 0.320           | 0.169              | 0.062            | 0.019             | <0.001           | 0.780                             | 0.000                              |       |
| 100           | OMO      | 182    | Carbonate     | 0.150           | 0.078              | 0.040            | 0.016             | <0.001           | 0.890                             | 0.000                              |       |
| 200           | OMO      | 49B    | Carbonate     | 0.420           | 0.185              | 0.081            | 0.017             | 0.001            | 0.670                             | 0.000                              |       |
| 222           | SHUY2    | 7      | Siliciclastic | 3.767           | 0.138              | 0.692            | 0.113             | 0.004            | 0.252                             | 0.004                              | 0.458 |
| 226.2         | SHUY2    | 6      | Siliciclastic | 3.824           | 0.126              | 0.803            | 0.106             | 0.001            | 0.271                             | 0.001                              | 0.461 |
| 227.9         | SHUY2    | 5      | Siliciclastic | 3.547           | 0.048              | 0.828            | 0.061             | 0.004            | 0.265                             | 0.004                              | 0.422 |
| 234.05        | SHUY1    | 12     | Siliciclastic | 2.118           | 0.081              | 0.832            | 0.069             | 0.001            | 0.464                             | 0.001                              | 0.491 |
| 234.2         | SHUY1    | 13     | Carbonate     | 2.495           | 0.344              | 1.437            | 0.054             | 0.006            | 0.738                             | 0.003                              | 1.755 |
| 234.3         | SHUY1    | 14     | Carbonate     | 2.184           | 1.412              | 0.358            | 0.008             | 0.005            | 0.817                             | 0.003                              | 1.612 |
| 234.55        | SHUY1    | 15     | Carbonate     | 2.383           | 0.327              | 1.454            | 0.048             | 0.002            | 0.768                             | 0.001                              | 1.894 |
| 234.75        | SHUY1    | 17     | Carbonate     | 0.448           | 0.103              | 0.125            | 0.003             | 0.002            | 0.517                             | 0.008                              |       |
| 234.85        | SHUY1    | 18     | Siliciclastic | 0.702           | 0.113              | 0.436            | 0.000             | 0.002            | 0.786                             | 0.004                              | 4.118 |
| 235           | SHUY1    | 19     | Carbonate     | 0.697           | 0.158              | 0.333            | 0.000             | 0.005            | 0.710                             | 0.010                              | 0.984 |
| 235.15        | SHUY1    | 21     | Carbonate     | 1.016           | 0.538              | 0.334            | 0.000             | 0.005            | 0.863                             | 0.006                              | 1.954 |
| 235.15        | SHUY1    | 20     | Carbonate     | 1.574           | 0.937              | 0.356            | 0.002             | 0.005            | 0.826                             | 0.004                              | 2.336 |
| 235.65        | SHUY1    | 22     | Carbonate     | 1.330           | 0.888              | 0.208            | 0.000             | 0.004            | 0.827                             | 0.004                              | 1.591 |
| 235.95        | SHUY1    | 23     | Carbonate     | 1.415           | 0.871              | 0.267            | 0.002             | 0.006            | 0.809                             | 0.005                              | 1.737 |
| 236.2         | SHUY1    | 24     | Carbonate     | 0.473           | 0.083              | 0.248            | 0.000             | 0.003            | 0.705                             | 0.008                              |       |
| 236.3         | SHUY1    | 25     | Carbonate     | 0.643           | 0.126              | 0.355            | 0.000             | 0.002            | 0.752                             | 0.005                              | 1.461 |
| 236.5         | SHUY1    | 26     | Carbonate     | 1.819           | 1.141              | 0.495            | 0.016             | 0.005            | 0.911                             | 0.003                              | 4.068 |
| 236.75        | SHUY1    | 27     | Carbonate     | 0.487           | 0.190              | 0.164            | 0.003             | 0.003            | 0.739                             | 0.008                              |       |
| 237.1         | SHUY1    | 28     | Siliciclastic | 2.984           | 0.064              | 1.254            | 0.098             | 0.001            | 0.474                             | 0.001                              | 0.735 |

|        |       |     |               |       |       |       |       |        |       |       |       |
|--------|-------|-----|---------------|-------|-------|-------|-------|--------|-------|-------|-------|
| 237.4  | SHUY1 | 29  | Siliciclastic | 0.454 | 0.225 | 0.091 | 0.000 | 0.002  | 0.701 | 0.007 |       |
| 237.5  | SHUY1 | 29A | Siliciclastic | 2.938 | 0.073 | 0.556 | 0.059 | 0.001  | 0.235 | 0.002 | 0.414 |
| 237.8  | SHUY1 | 30  | Siliciclastic | 0.897 | 0.279 | 0.134 | 0.016 | 0.002  | 0.480 | 0.004 | 0.997 |
| 238.5  | SHUY1 | 32  | Carbonate     | 4.132 | 0.043 | 0.892 | 0.229 | <0.001 | 0.282 | 0.000 | 0.451 |
| 239    | SHUY2 | 2   | Siliciclastic | 4.988 | 0.012 | 1.705 | 0.275 | <0.001 | 0.400 | 0.000 | 0.493 |
| 239.1  | SHUY1 | 33  | Carbonate     | 0.454 | 0.091 | 0.154 | 0.006 | 0.002  | 0.557 | 0.008 | 0.561 |
| 239.7  | SHUY1 | 34  | Carbonate     | 4.478 | 0.075 | 0.730 | 0.245 | <0.001 | 0.235 | 0.000 | 0.518 |
| 240    | SHUY2 | 1   | Siliciclastic | 5.492 | 0.046 | 1.516 | 0.132 | <0.001 | 0.308 | 0.000 | 0.476 |
| 241    | SHUY1 | 1   | Siliciclastic | 2.615 | 0.120 | 0.681 | 0.127 | 0.005  | 0.357 | 0.005 | 0.430 |
| 241.9  | SHUY1 | 2   | Siliciclastic | 4.405 | 0.081 | 1.325 | 0.385 | <0.001 | 0.407 | 0.000 | 0.426 |
| 242    | SHUY1 | 3   | Carbonate     | 2.428 | 0.103 | 1.474 | 0.055 | <0.001 | 0.672 | 0.000 | 1.339 |
| 242.1  | SHUY1 | 4   | Carbonate     | 2.702 | 0.132 | 1.942 | 0.064 | 0.004  | 0.793 | 0.002 | 1.984 |
| 242.3  | SHUY1 | 5   | Siliciclastic | 1.183 | 0.026 | 0.695 | 0.026 | <0.001 | 0.632 | 0.000 | 0.642 |
| 242.5  | SHUY1 | 6   | Carbonate     | 2.818 | 0.082 | 1.977 | 0.079 | <0.001 | 0.758 | 0.000 | 1.576 |
| 242.85 | SHUY1 | 7   | Carbonate     | 2.582 | 0.048 | 2.146 | 0.040 | <0.001 | 0.865 | 0.000 | 1.453 |
| 243.15 | SHUY1 | 8   | Carbonate     | 2.773 | 0.068 | 1.896 | 0.038 | <0.001 | 0.722 | 0.000 | 1.345 |
| 243.35 | SHUY1 | 9   | Siliciclastic | 2.750 | 0.043 | 1.751 | 0.054 | 0.001  | 0.673 | 0.001 | 1.164 |
| 243.75 | SHUY1 | 10  | Carbonate     | 0.377 | 0.156 | 0.120 | 0.000 | 0.003  | 0.739 | 0.010 |       |
| 243.9  | SHUY1 | 11  | Carbonate     | 0.396 | 0.124 | 0.071 | 0.004 | 0.002  | 0.508 | 0.010 |       |
| 248.8  | SHUY1 | 34A | Siliciclastic | 0.798 | 0.166 | 0.191 | 0.023 | <0.001 | 0.476 | 0.000 | 1.250 |
| 258.8  | SHUY1 | 34B | Siliciclastic | 4.164 | 0.046 | 0.740 | 0.202 | <0.001 | 0.238 | 0.000 | 0.461 |
| 268.8  | SHUY1 | 35  | Siliciclastic | 4.199 | 0.046 | 0.742 | 0.189 | <0.001 | 0.233 | 0.000 | 0.483 |
| 278.8  | SHUY1 | 37  | Siliciclastic | 3.941 | 0.074 | 0.797 | 0.302 | <0.001 | 0.298 | 0.000 | 0.516 |
| 288.8  | SHUY1 | 38  | Siliciclastic | 4.480 | 0.064 | 1.044 | 0.308 | <0.001 | 0.316 | 0.000 | 0.542 |
| 298.8  | SHUY1 | 40  | Siliciclastic | 4.675 | 0.050 | 0.830 | 0.215 | <0.001 | 0.234 | 0.000 | 0.536 |
| 303.8  | SHUY1 | 41  | Siliciclastic | 3.904 | 0.086 | 1.630 | 0.157 | <0.001 | 0.480 | 0.000 | 0.891 |
| 308.8  | SHUY1 | 42  | Siliciclastic | 4.582 | 0.033 | 1.075 | 0.240 | <0.001 | 0.294 | 0.000 | 0.501 |
| 318.8  | SHUY1 | 43  | Siliciclastic | 4.641 | 0.052 | 1.130 | 0.334 | <0.001 | 0.327 | 0.000 | 0.547 |
| 328.8  | SHUY1 | 44  | Siliciclastic | 4.846 | 0.041 | 1.290 | 0.265 | <0.001 | 0.329 | 0.000 | 0.547 |
| 338.8  | SHUY1 | 45  | Siliciclastic | 4.251 | 0.043 | 1.033 | 0.288 | <0.001 | 0.321 | 0.000 | 0.485 |

**Supplementary Table 4: Site 4 distal slope, Wadi Wasit South. Heights refer to Supplementary Fig. 4. Fe data in wt%.**

| Height<br>(m) | Locality | Number | Lith.         | Fe <sub>T</sub> | Fe <sub>Carb</sub> | Fe <sub>Ox</sub> | Fe <sub>Mag</sub> | Fe <sub>Pv</sub> | Fe <sub>HR</sub> /Fe <sub>T</sub> | Fe <sub>Pv</sub> /Fe <sub>HR</sub> | Fe/Al | δ <sup>34</sup> S <sub>py</sub><br>(‰) |
|---------------|----------|--------|---------------|-----------------|--------------------|------------------|-------------------|------------------|-----------------------------------|------------------------------------|-------|----------------------------------------|
| 0             | WWS1     | 84     | Carbonate     | 3.290           | 0.628              | 2.115            | 0.018             | 0.002            | 0.840                             | 0.001                              | 5.463 |                                        |
| 0.6           | WWS1     | 83     | Siliciclastic | 2.010           | 0.401              | 1.346            | 0.052             | 0.003            | 0.890                             | 0.001                              | 0.920 |                                        |
| 1.2           | WWS1     | 82     | Siliciclastic | 2.410           | 0.383              | 1.611            | 0.020             | 0.001            | 0.840                             | 0.001                              | 1.085 | 4.3                                    |
| 1.8           | WWS1     | 81     | Siliciclastic | 1.680           | 0.007              | 1.415            | 0.129             | 0.004            | 0.930                             | 0.002                              | 0.233 |                                        |
| 2.1           | WWS1     | 80     | Siliciclastic | 1.850           | 0.011              | 1.678            | 0.146             | 0.003            | 0.990                             | 0.001                              | 0.271 |                                        |
| 2.8           | WWS1     | 79     | Siliciclastic | 3.450           | 0.161              | 2.917            | 0.033             | 0.002            | 0.900                             | 0.000                              | 1.215 |                                        |
| 3.5           | WWS1     | 78     | Carbonate     | 0.250           | 0.086              | 0.094            | -0.003            | 0.002            | 0.710                             | 0.012                              |       |                                        |
| 3.7           | WWS1     | 77     | Siliciclastic | 3.480           | 0.081              | 2.646            | 0.086             | 0.004            | 0.810                             | 0.001                              | 0.726 |                                        |
| 4             | WWS1     | 76     | Siliciclastic | 3.650           | 0.071              | 3.049            | 0.069             | 0.002            | 0.880                             | 0.001                              | 0.939 |                                        |
| 4.5           | WWS1     | 75     | Siliciclastic | 3.050           | 0.017              | 2.503            | 0.076             | 0.002            | 0.850                             | 0.001                              | 0.854 |                                        |
| 5             | WWS1     | 74     | Siliciclastic | 2.120           | 0.016              | 1.821            | 0.083             | 0.003            | 0.910                             | 0.002                              | 0.379 |                                        |
| 5.8           | WWS1     | 72     | Carbonate     | 4.250           | 0.122              | 3.157            | 0.050             | 0.002            | 0.780                             | 0.001                              | 2.593 |                                        |
| 6.2           | WWS1     | 71     | Carbonate     | 1.840           | 0.159              | 1.278            | 0.032             | <0.001           | 0.800                             | 0.000                              | 0.655 |                                        |
| 7             | WWS1     | 70     | Carbonate     | 1.430           | 0.106              | 0.882            | 0.052             | 0.001            | 0.730                             | 0.001                              | 0.443 |                                        |
| 7.7           | WWS1     | 68     | Siliciclastic | 1.370           | 0.097              | 0.877            | 0.042             | 0.001            | 0.740                             | 0.001                              | 0.573 |                                        |
| 10.3          | WWS1     | 67     | Carbonate     | 0.810           | 0.152              | 0.443            | 0.028             | 0.001            | 0.770                             | 0.002                              | 1.170 |                                        |
| 11            | WWS1     | 66     | Siliciclastic | 1.200           | 0.106              | 0.933            | 0.051             | <0.001           | 0.910                             | 0.000                              | 0.544 |                                        |
| 12            | WWS1     | 65     | Carbonate     | 0.260           | 0.188              | 0.049            | 0.013             | <0.001           | 0.950                             | 0.001                              |       | 24.5                                   |
| 13            | WWS1     | 64     | Carbonate     | 0.900           | 0.109              | 0.571            | 0.034             | <0.001           | 0.790                             | 0.000                              | 0.434 |                                        |
| 14            | WWS1     | 63     | Carbonate     | 0.220           | 0.043              | 0.103            | 0.017             | <0.001           | 0.730                             | 0.001                              |       |                                        |
| 16            | WWS1     | 62     | Carbonate     | 1.070           | 0.185              | 0.634            | 0.032             | 0.002            | 0.800                             | 0.002                              | 0.752 |                                        |
| 17.2          | WWS1     | 61     | Carbonate     | 0.480           | 0.160              | 0.234            | 0.019             | 0.002            | 0.870                             | 0.004                              |       |                                        |
| 18            | WWS1     | 60     | Carbonate     | 0.990           | 0.233              | 0.483            | 0.024             | 0.003            | 0.750                             | 0.004                              | 1.005 |                                        |
| 19            | WWS1     | 59     | Siliciclastic | 2.930           | 0.096              | 1.952            | 0.047             | 0.001            | 0.720                             | 0.001                              | 1.327 | 14                                     |
| 19.5          | WWS1     | 58     | Carbonate     | 1.580           | 0.315              | 0.783            | 0.030             | 0.003            | 0.720                             | 0.002                              | 0.807 |                                        |
| 20            | WWS1     | 57     | Siliciclastic | 0.880           | 0.293              | 0.381            | 0.024             | 0.003            | 0.800                             | 0.004                              | 0.779 |                                        |
| 20.8          | WWS1     | 56     | Carbonate     | 0.590           | 0.098              | 0.315            | 0.021             | 0.001            | 0.740                             | 0.002                              | 0.491 | 17.6                                   |
| 21.2          | WWS1     | 55     | Siliciclastic | 1.980           | 0.174              | 1.323            | 0.059             | 0.004            | 0.790                             | 0.002                              | 1.177 |                                        |

|      |      |    |               |       |       |       |       |        |       |       |       |      |
|------|------|----|---------------|-------|-------|-------|-------|--------|-------|-------|-------|------|
| 21.9 | WWS1 | 54 | Carbonate     | 0.480 | 0.073 | 0.287 | 0.018 | 0.002  | 0.790 | 0.004 |       |      |
| 22.2 | WWS1 | 52 | Carbonate     | 0.280 | 0.230 | 0.152 | 0.014 | 0.001  | 1.400 | 0.001 |       |      |
| 23   | WWS1 | 53 | Siliciclastic | 1.330 | 0.185 | 1.524 | 0.037 | 0.001  | 1.310 | 0.001 | 0.751 |      |
| 23.9 | WWS1 | 51 | Siliciclastic | 0.660 | 0.065 | 0.403 | 0.022 | 0.002  | 0.740 | 0.003 | 0.842 | 17.1 |
| 24.9 | WWS1 | 50 | Siliciclastic | 2.210 | 0.188 | 1.753 | 0.035 | 0.005  | 0.900 | 0.002 | 1.039 | 14.2 |
| 25.4 | WWS1 | 49 | Siliciclastic | 2.450 | 0.044 | 1.466 | 0.036 | 0.003  | 0.630 | 0.002 | 0.560 |      |
| 26.8 | WWS1 | 48 | Carbonate     | 0.730 | 0.259 | 0.270 | 0.020 | 0.001  | 0.750 | 0.002 | 0.664 |      |
| 27.8 | WWS1 | 47 | Carbonate     | 0.900 | 0.351 | 0.312 | 0.022 | <0.001 | 0.760 | 0.001 | 0.910 |      |
| 29.2 | WWS1 | 46 | Carbonate     | 0.550 | 0.145 | 0.247 | 0.019 | 0.001  | 0.740 | 0.002 | 0.790 |      |
| 30.3 | WWS1 | 45 | Carbonate     | 0.310 | 0.129 | 0.110 | 0.020 | 0.002  | 0.840 | 0.008 |       |      |
| 32.3 | WWS1 | 44 | Carbonate     | 0.690 | 0.027 | 0.024 | 0.002 | 0.002  | 0.080 | 0.033 | 0.824 |      |
| 34.2 | WWS1 | 43 | Carbonate     | 0.250 | 0.125 | 0.076 | 0.018 | 0.002  | 0.890 | 0.009 |       |      |
| 36   | WWS1 | 42 | Carbonate     | 2.250 | 0.240 | 1.710 | 0.033 | 0.001  | 0.880 | 0.001 | 1.089 |      |
| 37   | WWS1 | 41 | Carbonate     | 0.260 | 0.096 | 0.093 | 0.017 | <0.001 | 0.790 | 0.000 |       |      |
| 39   | WWS1 | 40 | Carbonate     | 0.330 | 0.121 | 0.108 | 0.023 | <0.001 | 0.770 | 0.000 |       |      |
| 41   | WWS1 | 39 | Siliciclastic | 1.370 | 0.135 | 0.707 | 0.038 | <0.001 | 0.640 | 0.000 | 0.718 |      |
| 42   | WWS1 | 38 | Carbonate     | 1.750 | 0.165 | 1.256 | 0.044 | <0.001 | 0.840 | 0.000 | 1.006 |      |
| 43   | WWS1 | 37 | Carbonate     | 0.700 | 0.118 | 0.306 | 0.020 | <0.001 | 0.630 | 0.001 | 0.427 |      |
| 45   | WWS1 | 36 | Carbonate     | 0.480 | 0.000 | 0.000 | 0.000 | 0.001  | 0.000 | 0.950 |       |      |
| 46.2 | WWS1 | 35 | Carbonate     | 0.280 | 0.127 | 0.090 | 0.014 | <0.001 | 0.820 | 0.001 |       |      |
| 47   | WWS1 | 34 | Siliciclastic | 2.050 | 0.095 | 1.550 | 0.057 | 0.001  | 0.830 | 0.000 | 1.006 |      |
| 47.5 | WWS1 | 33 | Siliciclastic | 2.240 | 0.086 | 1.259 | 0.074 | 0.001  | 0.640 | 0.000 | 1.268 |      |
| 48   | WWS1 | 32 | Carbonate     | 0.420 | 0.237 | 0.100 | 0.006 | 0.001  | 0.820 | 0.002 |       |      |
| 49   | WWS1 | 30 | Carbonate     | 0.590 | 0.301 | 0.083 | 0.010 | 0.034  | 0.730 | 0.079 | 1.419 |      |
| 51   | WWS1 | 29 | Carbonate     | 0.510 | 0.108 | 0.203 | 0.008 | 0.001  | 0.630 | 0.002 | 0.482 |      |
| 53   | WWS1 | 28 | Carbonate     | 1.110 | 0.342 | 0.520 | 0.011 | <0.001 | 0.780 | 0.001 | 1.803 |      |
| 57   | WWS1 | 26 | Carbonate     | 0.300 | 0.161 | 0.062 | 0.004 | 0.001  | 0.770 | 0.005 |       |      |
| 60.8 | WWS1 | 25 | Carbonate     | 0.350 | 0.219 | 0.055 | 0.005 | 0.001  | 0.810 | 0.004 |       |      |
| 63.8 | WWS1 | 22 | Carbonate     | 0.490 | 0.253 | 0.082 | 0.010 | 0.001  | 0.710 | 0.003 |       |      |
| 69.8 | WWS1 | 20 | Carbonate     | 0.410 | 0.156 | 0.081 | 0.006 | 0.001  | 0.600 | 0.004 |       |      |
| 75   | WWS1 | 17 | Carbonate     | 0.470 | 0.270 | 0.093 | 0.007 | 0.001  | 0.780 | 0.002 |       |      |
| 80.8 | WWS1 | 16 | Carbonate     | 0.930 | 0.419 | 0.113 | 0.020 | 0.002  | 0.600 | 0.003 | 0.829 |      |



|       |      |    |           |       |       |       |       |        |       |       |       |
|-------|------|----|-----------|-------|-------|-------|-------|--------|-------|-------|-------|
| 83.7  | WWS1 | 15 | Carbonate | 0.690 | 0.410 | 0.149 | 0.010 | 0.002  | 0.830 | 0.003 | 1.193 |
| 87    | WWS1 | 13 | Carbonate | 0.920 | 0.398 | 0.198 | 0.017 | 0.001  | 0.670 | 0.001 | 1.172 |
| 91    | WWS1 | 11 | Carbonate | 0.470 | 0.255 | 0.132 | 0.007 | 0.001  | 0.830 | 0.002 |       |
| 93    | WWS1 | 10 | Carbonate | 0.480 | 0.256 | 0.143 | 0.006 | 0.001  | 0.850 | 0.002 |       |
| 95    | WWS1 | 8  | Carbonate | 0.480 | 0.272 | 0.152 | 0.006 | <0.001 | 0.900 | 0.000 |       |
| 97    | WWS1 | 6  | Carbonate | 0.370 | 0.153 | 0.155 | 0.009 | <0.001 | 0.860 | 0.001 |       |
| 101.2 | WWS1 | 3  | Carbonate | 0.860 | 0.219 | 0.480 | 0.009 | 0.001  | 0.830 | 0.001 | 0.726 |
| 104.2 | WWS1 | 1  | Carbonate | 0.980 | 0.158 | 0.501 | 0.013 | 0.001  | 0.690 | 0.002 | 0.631 |

**Supplementary Table 5: Site 4 distal slope upper, Radio Tower. Heights refer to Supplementary Fig. 5. Fe data in wt%.**

| Height<br>(m) | Locality | Number | Lithology     | $\delta^{13}\text{C}$<br>(‰PDB) | $\delta^{18}\text{O}$<br>(‰PDB) | $\text{Fe}_T$ | $\text{Fe}_{\text{Carb}}$ | $\text{Fe}_{\text{Ox}}$ | $\text{Fe}_{\text{Mag}}$ | $\text{Fe}_{\text{Py}}$ | $\text{Fe}_{\text{HR}}/\text{Fe}_T$ | $\text{Fe}_{\text{Py}}/\text{Fe}_{\text{HR}}$ | $\text{Fe}/\text{Al}$ |
|---------------|----------|--------|---------------|---------------------------------|---------------------------------|---------------|---------------------------|-------------------------|--------------------------|-------------------------|-------------------------------------|-----------------------------------------------|-----------------------|
| 0             | RT1      | 1      | Carbonate     | -1.803                          | -4.238                          | 0.380         | 0.082                     | 0.189                   | 0.002                    | <0.001                  | 0.720                               | 0.001                                         |                       |
| 1             | RT1      | 2      | Carbonate     | -1.561                          | -4.710                          | 0.640         | 0.095                     | 0.278                   | 0.005                    | 0.001                   | 0.590                               | 0.002                                         | 0.751                 |
| 2             | RT1      | 3      | Carbonate     | -1.522                          | -4.614                          | 0.780         | 0.142                     | 0.317                   | 0.001                    | <0.001                  | 0.590                               | 0.000                                         | 1.186                 |
| 3             | RT1      | 4      | Carbonate     | -1.183                          | -5.183                          | 0.440         | 0.206                     | 0.096                   | 0.000                    | <0.001                  | 0.680                               | 0.001                                         |                       |
| 4             | RT1      | 5      | Carbonate     | -1.861                          | -4.593                          | 1.030         | 0.135                     | 0.509                   | 0.006                    | <0.001                  | 0.630                               | 0.000                                         | 1.001                 |
| 4.5           | RT1      | 4A     | Siliciclastic |                                 |                                 | 1.260         | 0.215                     | 0.648                   | 0.021                    | 0.001                   | 0.700                               | 0.001                                         | 0.946                 |
| 5.2           | RT1      | 6      | Carbonate     | -0.859                          | -3.918                          | 0.760         | 0.062                     | 0.337                   | 0.004                    | 0.001                   | 0.530                               | 0.002                                         | 0.632                 |
| 6.2           | RT1      | 7      | Carbonate     | -0.408                          | -4.327                          | 0.490         | 0.252                     | 0.096                   | 0.000                    | <0.001                  | 0.700                               | 0.001                                         |                       |
| 7.4           | RT1      | 8      | Carbonate     | -1.039                          | -4.179                          | 0.670         | 0.048                     | 0.326                   | 0.007                    | 0.001                   | 0.570                               | 0.002                                         | 0.535                 |
| 8.7           | RT1      | 9      | Carbonate     | -0.828                          | -4.531                          | 0.490         | 0.049                     | 0.189                   | 0.000                    | <0.001                  | 0.490                               | 0.002                                         |                       |
| 9.5           | RT1      | 10     | Carbonate     | -0.471                          | -4.168                          | 0.480         | 0.210                     | 0.209                   | 0.000                    | 0.001                   | 0.860                               | 0.001                                         |                       |
| 10.3          | RT1      | 11     | Carbonate     | -0.414                          | -4.228                          | 0.680         | 0.046                     | 0.322                   | 0.003                    | 0.001                   | 0.550                               | 0.002                                         | 0.628                 |
| 11.2          | RT1      | 12     | Carbonate     | -0.463                          | -3.510                          | 0.500         | 0.036                     | 0.193                   | 0.003                    | <0.001                  | 0.460                               | 0.002                                         | 0.637                 |
| 12.3          | RT1      | 13     | Carbonate     | -0.876                          | -3.020                          | 0.730         | 0.034                     | 0.375                   | 0.007                    | <0.001                  | 0.570                               | 0.000                                         | 0.693                 |
| 13.1          | RT1      | 14     | Carbonate     | 0.292                           | -3.365                          | 0.340         | 0.201                     | 0.084                   | 0.000                    | <0.001                  | 0.830                               | 0.001                                         |                       |
| 14.1          | RT1      | 15     | Carbonate     | 0.535                           | -3.898                          | 0.390         | 0.119                     | 0.093                   | 0.000                    | <0.001                  | 0.540                               | 0.000                                         |                       |
| 15.1          | RT1      | 16     | Carbonate     | -0.012                          | -3.150                          | 0.740         | 0.021                     | 0.297                   | 0.007                    | <0.001                  | 0.440                               | 0.000                                         | 0.487                 |
| 15.6          | RT1      | 17     | Carbonate     | 0.320                           | -2.142                          | 0.630         | 0.019                     | 0.196                   | 0.003                    | <0.001                  | 0.340                               | 0.001                                         | 0.516                 |
| 16.5          | RT1      | 18     | Carbonate     | 0.694                           | -4.931                          | 0.240         | 0.075                     | 0.060                   | 0.000                    | 0.001                   | 0.550                               | 0.005                                         |                       |
| 17.5          | RT1      | 19     | Carbonate     | 1.087                           | -4.202                          | 0.440         | 0.115                     | 0.129                   | 0.001                    | <0.001                  | 0.560                               | 0.001                                         |                       |
| 18.1          | RT1      | 20     | Carbonate     | 0.698                           | -4.299                          | 0.480         | 0.031                     | 0.169                   | 0.001                    | 0.001                   | 0.420                               | 0.003                                         |                       |
| 19            | RT1      | 21     | Carbonate     | 0.989                           | -4.057                          | 0.640         | 0.037                     | 0.284                   | 0.001                    | <0.001                  | 0.500                               | 0.001                                         | 0.687                 |
| 19.5          | RT1      | 22     | Carbonate     |                                 |                                 | 1.150         | 0.085                     | 0.699                   | 0.021                    | <0.001                  | 0.700                               | 0.000                                         | 1.778                 |
| 20.6          | RT1      | 23     | Carbonate     | 3.096                           | -2.556                          | 0.530         | 0.032                     | 0.445                   | 0.006                    | <0.001                  | 0.920                               | 0.000                                         | 1.287                 |
| 21.6          | RT1      | 24     | Carbonate     | 4.778                           | -3.242                          | 0.420         | 0.025                     | 0.138                   | 0.000                    | <0.001                  | 0.380                               | 0.002                                         |                       |
| 22            | RT1      | 25     | Carbonate     | 4.870                           | -2.981                          | 0.420         | 0.024                     | 0.138                   | 0.000                    | 0.001                   | 0.390                               | 0.003                                         |                       |

|      |     |    |           |        |        |       |       |       |       |        |       |       |       |
|------|-----|----|-----------|--------|--------|-------|-------|-------|-------|--------|-------|-------|-------|
| 23.5 | RT1 | 26 | Carbonate | 6.733  | -2.812 | 0.370 | 0.046 | 0.119 | 0.000 | <0.001 | 0.430 | 0.002 |       |
| 24.1 | RT1 | 27 | Carbonate | 6.209  | -4.821 | 0.310 | 0.099 | 0.101 | 0.000 | <0.001 | 0.640 | 0.001 |       |
| 25   | RT1 | 28 | Carbonate | 2.811  | -3.868 | 0.450 | 0.188 | 0.120 | 0.001 | 0.001  | 0.680 | 0.002 |       |
| 27   | RT1 | 30 | Carbonate | 3.576  | -3.500 | 0.270 | 0.061 | 0.083 | 0.000 | <0.001 | 0.520 | 0.003 |       |
| 27.5 | RT1 | 31 | Carbonate | -1.676 | -5.087 | 3.110 | 0.003 | 1.682 | 0.035 | 0.001  | 0.550 | 0.000 | 1.137 |
| 27.7 | RT1 | 32 | Carbonate | -0.885 | -2.382 | 2.110 | 0.023 | 1.308 | 0.023 | <0.001 | 0.640 | 0.000 | 1.328 |
| 28   | RT1 | 33 | Carbonate | -0.476 | -2.294 | 2.490 | 0.003 | 1.661 | 0.043 | 0.001  | 0.690 | 0.000 | 1.266 |
| 28.1 | RT1 | 34 | Carbonate | 1.330  | -4.297 | 0.370 | 0.166 | 0.086 | 0.003 | <0.001 | 0.690 | 0.000 |       |
| 28.8 | RT1 | 35 | Carbonate | -0.458 | -4.622 | 1.850 | 0.161 | 1.139 | 0.059 | <0.001 | 0.740 | 0.000 | 1.545 |
| 29   | RT1 | 36 | Carbonate | 1.657  | -4.193 | 0.300 | 0.243 | 0.011 | 0.000 | <0.001 | 0.860 | 0.000 |       |
| 30.9 | RT1 | 37 | Carbonate | -1.667 | -2.329 | 1.520 | 0.059 | 1.208 | 0.024 | <0.001 | 0.850 | 0.000 | 1.002 |
| 34.2 | RT1 | 38 | Carbonate | -0.766 | -4.449 | 0.320 | 0.105 | 0.101 | 0.003 | <0.001 | 0.650 | 0.000 |       |
| 35.5 | RT1 | 39 | Carbonate | 0.011  | -5.402 | 0.860 | 0.238 | 0.366 | 0.012 | <0.001 | 0.720 | 0.000 | 1.998 |
| 36.1 | RT1 | 40 | Carbonate | 0.387  | -4.877 | 0.430 | 0.222 | 0.110 | 0.002 | <0.001 | 0.770 | 0.000 |       |
| 37.9 | RT1 | 41 | Carbonate | -0.474 | -4.151 | 1.480 | 0.084 | 0.063 | 0.005 | <0.001 | 0.100 | 0.002 | 1.789 |
| 39   | RT1 | 42 | Carbonate | 0.182  | -4.411 | 0.280 | 0.171 | 0.529 | 0.01  | 0.001  | 2.550 | 0.002 |       |

**Supplementary Table 6: Site 5 seamount, Baid. Heights refer to Supplementary Fig. 6. Fe data in wt%.**

| <b>Height (m)</b> | <b>Locality</b> | <b>Number</b> | <b>Lithology</b> | <b>Fe<sub>T</sub></b> | <b>Fe<sub>Carb</sub></b> | <b>Fe<sub>Ox</sub></b> | <b>Fe<sub>Mag</sub></b> | <b>Fe<sub>Pv</sub></b> | <b>Fe<sub>HR</sub>/Fe<sub>T</sub></b> | <b>Fe<sub>Pv</sub>/Fe<sub>HR</sub></b> |
|-------------------|-----------------|---------------|------------------|-----------------------|--------------------------|------------------------|-------------------------|------------------------|---------------------------------------|----------------------------------------|
| 0                 | BAID            | 1             | Carbonate        | 0.375                 | 0.242                    | 0.016                  | 0.013                   | <0.001                 | 0.721                                 | 0.000                                  |
| 1                 | BAID            | 2             | Carbonate        | 0.465                 | 0.205                    | 0.043                  | 0.010                   | <0.001                 | 0.557                                 | 0.000                                  |
| 2                 | BAID            | 3             | Carbonate        | 0.252                 | 0.128                    | 0.021                  | 0.010                   | <0.001                 | 0.630                                 | 0.000                                  |
| 3                 | BAID            | 4             | Carbonate        | 0.397                 | 0.000                    | 0.138                  | 0.016                   | <0.001                 | 0.387                                 | 0.000                                  |
| 3.2               | BAID            | 5             | Carbonate        | 0.000                 | 0.000                    | 0.000                  | 0.001                   | <0.001                 |                                       | 0.000                                  |
| 3.7               | BAID            | 6             | Carbonate        | 0.157                 | 0.003                    | 0.045                  | 0.015                   | <0.001                 | 0.400                                 | 0.000                                  |
| 4.5               | BAID            | 7             | Carbonate        | 0.334                 | 0.000                    | 0.109                  | 0.015                   | <0.001                 | 0.370                                 | 0.000                                  |
| 6                 | BAID            | 8             | Carbonate        | 0.040                 | 0.000                    | 0.011                  | 0.000                   | <0.001                 | 0.260                                 | 0.000                                  |
| 6.3               | BAID            | 9             | Carbonate        | 0.000                 | 0.000                    | 0.000                  | 0.000                   | <0.001                 |                                       | 0.000                                  |
| 7.3               | BAID            | 10            | Carbonate        | 0.229                 | 0.000                    | 0.085                  | 0.000                   | <0.001                 | 0.373                                 | 0.000                                  |
| 7.8               | BAID            | 11            | Carbonate        | 0.190                 | 0.000                    | 0.001                  | 0.000                   | <0.001                 | 0.004                                 | 0.000                                  |
| 8                 | BAID            | 12            | Carbonate        | 0.179                 | 0.000                    | 0.068                  | 0.000                   | <0.001                 | 0.379                                 | 0.000                                  |
| 11.5              | BAID            | 13            | Carbonate        | 0.000                 | 0.000                    | 0.000                  | 0.000                   | <0.001                 |                                       | 0.000                                  |
| 12                | BAID            | 14            | Carbonate        | 0.011                 | 0.000                    | 0.000                  | 0.000                   | <0.001                 | 0.099                                 | 0.000                                  |
| 12.5              | BAID            | 15            | Carbonate        | 0.212                 | 0.005                    | 0.075                  | 0.000                   | <0.001                 | 0.378                                 | 0.000                                  |
| 13                | BAID            | 16            | Carbonate        | 0.199                 | 0.004                    | 0.075                  | 0.000                   | <0.001                 | 0.402                                 | 0.000                                  |
| 13.2              | BAID            | 17            | Carbonate        | 0.021                 | 0.000                    | 0.011                  | 0.000                   | <0.001                 | 0.644                                 | 0.000                                  |
| 13.3              | BAID            | 18            | Carbonate        | 0.091                 | 0.000                    | 0.057                  | 0.000                   | <0.001                 | 0.627                                 | 0.000                                  |

**Supplementary Table 7: Site 6 Deep Basin, Buday'ah. Heights refer to Supplementary Fig. 7. Fe data in wt%.**

| Height (m) | Locality | Number | Lithology     | Fe <sub>T</sub> | Fe <sub>Carb</sub> | Fe <sub>Ox</sub> | Fe <sub>Mag</sub> | Fe <sub>Pv</sub> | Fe <sub>HR</sub> /Fe <sub>T</sub> | Fe <sub>Pv</sub> /Fe <sub>HR</sub> | Fe/Al | $\delta^{34}\text{S}_{\text{py}}$ (‰) |
|------------|----------|--------|---------------|-----------------|--------------------|------------------|-------------------|------------------|-----------------------------------|------------------------------------|-------|---------------------------------------|
| 0.1        | BUD1     | 1      | Radiolarian   | 4.346           | 0.147              | 0.981            | 0.236             | <0.001           | 0.314                             | 0.000                              | 1.799 |                                       |
| 0.5        | BUD1     | 2      | Radiolarian   | 5.876           | 0.077              | 2.914            | 0.287             | <0.001           | 0.543                             | 0.000                              | 1.368 |                                       |
| 0.7        | BUD1     | 3      | Radiolarian   | 3.129           | 0.054              | 1.763            | 0.119             | <0.001           | 0.618                             | 0.000                              | 0.892 |                                       |
| 1.1        | BUD1     | 4      | Radiolarian   | 0.961           | 0.000              | 0.585            | 0.013             | <0.001           | 0.622                             | 0.000                              | 0.249 |                                       |
| 1.3        | BUD1     | 5      | Radiolarian   | 1.514           | 0.000              | 0.969            | 0.029             | <0.001           | 0.660                             | 0.000                              | 0.292 |                                       |
| 1.8        | BUD1     | 6      | Radiolarian   | 1.107           | 0.079              | 0.563            | 0.015             | <0.001           | 0.593                             | 0.000                              | 0.979 |                                       |
| 2.4        | BUD1     | 7      | Radiolarian   | 2.432           | 0.000              | 1.498            | 0.021             | <0.001           | 0.625                             | 0.000                              | 0.352 |                                       |
| 2.9        | BUD1     | 8      | Radiolarian   | 3.506           | 0.010              | 2.814            | 0.056             | 0.002            | 0.822                             | 0.001                              | 0.500 |                                       |
| 3.5        | BUD1     | 9      | Radiolarian   | 4.627           | 0.044              | 2.637            | 0.224             | <0.001           | 0.628                             | 0.000                              | 0.794 | 3.2                                   |
| 3.6        | BUD1     | 10     | Radiolarian   | 3.338           | 0.005              | 2.487            | 0.067             | <0.001           | 0.766                             | 0.000                              | 0.490 | 7.7                                   |
| 4.8        | BUD1     | 11     | Siliciclastic | 5.396           | 0.002              | 4.606            | 0.121             | 0.003            | 0.877                             | 0.001                              | 0.808 |                                       |
| 5.0        | BUD1     | 12     | Siliciclastic | 4.319           | 0.057              | 1.993            | 0.219             | <0.001           | 0.525                             | 0.000                              | 0.585 |                                       |
| 5.3        | BUD1     | 13     | Siliciclastic | 21.226          | 0.035              | 15.461           | 0.756             | <0.001           | 0.766                             | 0.000                              | 4.008 |                                       |
| 5.7        | BUD1     | 14     | Siliciclastic | 2.236           | 0.030              | 0.327            | 0.063             | <0.001           | 0.188                             | 0.000                              | 0.353 | 7.7                                   |
| 6.1        | BUD1     | 15     | Siliciclastic | 3.871           | 0.030              | 2.065            | 0.142             | 0.014            | 0.581                             | 0.006                              | 0.727 | -15                                   |
| 6.3        | BUD1     | 16     | Siliciclastic | 2.484           | 0.011              | 1.577            | 0.038             | 0.003            | 0.656                             | 0.002                              | 0.343 | 2.2                                   |
| 6.4        | BUD1     | 17     | Siliciclastic | 5.048           | 0.036              | 2.900            | 0.173             | 0.019            | 0.620                             | 0.006                              | 0.779 |                                       |
| 6.6        | BUD1     | 18     | Siliciclastic | 3.975           | 0.047              | 1.240            | 0.209             | <0.001           | 0.376                             | 0.000                              | 0.613 |                                       |
| 7.3        | BUD1     | 19     | Siliciclastic | 3.503           | 0.030              | 1.478            | 0.126             | <0.001           | 0.467                             | 0.000                              | 0.537 |                                       |
| 7.4        | BUD1     | 20     | Siliciclastic | 4.291           | 0.123              | 1.308            | 0.235             | 0.001            | 0.388                             | 0.000                              | 0.710 |                                       |
| 7.6        | BUD1     | 21     | Siliciclastic | 4.239           | 0.068              | 1.205            | 0.222             | <0.001           | 0.353                             | 0.000                              | 0.702 |                                       |
| 7.9        | BUD1     | 22     | Siliciclastic | 6.842           | 0.149              | 1.648            | 0.414             | <0.001           | 0.323                             | 0.000                              | 1.107 |                                       |
| 8.0        | BUD1     | 23     | Carbonate     | 2.258           | 0.337              | 0.330            | 0.108             | <0.001           | 0.343                             | 0.000                              | 0.811 | 14.2                                  |
| 8.3        | BUD1     | 24     | Siliciclastic | 7.625           | 0.184              | 1.923            | 0.536             | 0.001            | 0.347                             | 0.000                              | 1.178 |                                       |
| 8.6        | BUD1     | 25     | Siliciclastic | 5.940           | 0.087              | 1.540            | 0.416             | <0.001           | 0.344                             | 0.000                              | 0.966 |                                       |
| 9.1        | BUD1     | 26     | Siliciclastic | 4.553           | 0.216              | 0.995            | 0.243             | 0.001            | 0.319                             | 0.001                              | 0.869 |                                       |
| 9.5        | BUD1     | 27     | Siliciclastic | 3.986           | 0.035              | 1.289            | 0.129             | 0.003            | 0.365                             | 0.002                              | 0.581 |                                       |

|      |      |    |               |       |       |       |       |        |       |       |       |      |
|------|------|----|---------------|-------|-------|-------|-------|--------|-------|-------|-------|------|
| 9.9  | BUD1 | 28 | Carbonate     | 0.703 | 0.206 | 0.156 | 0.024 | 0.001  | 0.551 | 0.003 | 0.705 | 10.5 |
| 10.3 | BUD1 | 29 | Siliciclastic | 1.304 | 0.144 | 0.234 | 0.036 | 0.002  | 0.319 | 0.004 | 0.503 | 27.6 |
| 10.9 | BUD1 | 31 | Siliciclastic | 1.098 | 0.185 | 0.193 | 0.022 | 0.001  | 0.366 | 0.003 | 0.603 | 17.4 |
| 11.0 | BUD1 | 32 | Siliciclastic | 2.022 | 0.179 | 0.334 | 0.077 | 0.003  | 0.293 | 0.004 | 0.650 |      |
| 11.6 | BUD1 | 33 | Siliciclastic | 3.773 | 0.049 | 1.061 | 0.124 | 0.001  | 0.327 | 0.001 | 0.519 |      |
| 12.2 | BUD1 | 34 | Carbonate     | 0.746 | 0.220 | 0.110 | 0.030 | <0.001 | 0.483 | 0.000 | 0.938 | 16.4 |
| 13.0 | BUD1 | 35 | Siliciclastic | 0.596 | 0.169 | 0.106 | 0.024 | 0.001  | 0.503 | 0.002 | 0.531 |      |
| 13.1 | BUD1 | 36 | Carbonate     | 0.602 | 0.289 | 0.048 | 0.018 | <0.001 | 0.589 | 0.000 | 0.927 |      |
| 13.3 | BUD1 | 37 | Siliciclastic | 2.395 | 0.237 | 0.514 | 0.130 | <0.001 | 0.368 | 0.000 | 0.570 | 16.4 |
| 14.1 | BUD1 | 38 | Carbonate     | 2.319 | 0.401 | 0.288 | 0.065 | 0.002  | 0.326 | 0.002 | 1.004 |      |
| 14.3 | BUD1 | 39 | Siliciclastic | 3.990 | 0.069 | 0.883 | 0.092 | <0.001 | 0.261 | 0.000 | 0.534 |      |
| 15.2 | BUD1 | 40 | Siliciclastic | 5.368 | 0.179 | 1.424 | 0.373 | <0.001 | 0.368 | 0.000 | 0.795 | 11.3 |
| 16.2 | BUD1 | 41 | Carbonate     | 0.793 | 0.268 | 0.121 | 0.023 | 0.001  | 0.520 | 0.002 | 0.929 |      |
| 17.0 | BUD1 | 42 | Siliciclastic | 1.139 | 0.194 | 0.183 | 0.041 | 0.003  | 0.370 | 0.007 | 0.584 |      |
| 17.2 | BUD1 | 43 | Carbonate     | 0.998 | 0.267 | 0.188 | 0.026 | <0.001 | 0.481 | 0.000 | 0.768 | 16.6 |
| 17.5 | BUD1 | 44 | Siliciclastic | 1.959 | 0.169 | 0.374 | 0.077 | 0.001  | 0.318 | 0.002 | 0.595 |      |
| 19.5 | BUD1 | 45 | Siliciclastic | 0.394 | 0.147 | 0.071 | 0.006 | 0.001  | 0.571 | 0.002 |       |      |
| 19.9 | BUD1 | 46 | Siliciclastic | 0.640 | 0.157 | 0.118 | 0.012 | 0.001  | 0.450 | 0.002 | 0.557 |      |
| 20.4 | BUD2 | 1  | Carbonate     | 0.514 | 0.154 | 0.170 | 0.011 | 0.001  | 0.655 | 0.004 | 0.547 | 32.5 |
| 20.6 | BUD2 | 2  | Carbonate     | 2.514 | 0.131 | 0.463 | 0.095 | <0.001 | 0.274 | 0.000 | 0.514 | 23.1 |
| 21.0 | BUD2 | 3  | Siliciclastic | 0.740 | 0.138 | 0.169 | 0.019 | 0.003  | 0.444 | 0.008 | 0.429 |      |
| 22.0 | BUD2 | 4  | Carbonate     | 4.768 | 0.117 | 1.450 | 0.355 | <0.001 | 0.403 | 0.000 | 0.658 | 24.9 |
| 22.7 | BUD2 | 5  | Siliciclastic | 0.503 | 0.138 | 0.114 | 0.016 | <0.001 | 0.535 | 0.005 | 0.395 |      |
| 23.9 | BUD2 | 7  | Carbonate     | 3.219 | 0.219 | 0.330 | 0.119 | <0.001 | 0.207 | 0.000 | 0.782 |      |
| 24.6 | BUD2 | 8  | Carbonate     | 1.090 | 0.188 | 0.116 | 0.035 | <0.001 | 0.311 | 0.001 | 0.573 |      |
| 25.4 | BUD2 | 9  | Carbonate     | 2.104 | 0.147 | 0.279 | 0.051 | <0.001 | 0.226 | 0.000 | 0.547 |      |
| 27.0 | BUD2 | 10 | Siliciclastic | 0.477 | 0.170 | 0.221 | 0.008 | <0.001 | 0.834 | 0.000 |       |      |
| 28.9 | BUD2 | 11 | Siliciclastic | 0.678 | 0.151 | 0.203 | 0.017 | 0.004  | 0.553 | 0.010 | 0.470 |      |
| 31.5 | BUD2 | 12 | Carbonate     | 2.234 | 0.219 | 0.334 | 0.100 | 0.001  | 0.293 | 0.002 | 0.607 | 9.9  |
| 33.1 | BUD2 | 13 | Carbonate     | 1.959 | 0.236 | 0.211 | 0.066 | 0.002  | 0.263 | 0.004 | 0.849 |      |
| 34.9 | BUD2 | 14 | Carbonate     | 4.675 | 0.072 | 1.119 | 0.191 | 0.001  | 0.296 | 0.001 | 0.702 |      |

### ***Supplementary Note 1: Section Descriptions***

The principle platform site utilized for Fe-speciation is the Saiq Plateau (Supplementary Fig. 1). Facies include pack-grainstone dominated textures representing shoal to fore-shoal deposits<sup>4</sup>. The PTB is characterized by early dolomites and, locally, a poorly developed laminated shale or a breccia level. As such it was not possible to sample the shale directly, however there is no apparent Fe-enrichment from this lithology, as is clear for the slope section in red-orange marls. Bioturbated early marine dolomites then characterize the entire Induan. Olive gray-purple shales and yellow marls characterize the end-Dienerian with a switch to limestones in the lower Smithian. This increase in siliciclastic may reflect the increased weathering rates observed elsewhere at the peak of sedimentation rates in the Early Triassic<sup>5</sup>. Small foraminifera and the bivalve *Claraia* are seen in carbonates at the end-Dienerian.

The Wasit Block (site 2) represents a block of Late-Permian and Griesbachian platform carbonates that were reworked into slope breccias during the Dienerian<sup>2</sup>. Fe-speciation analysis was not performed on this section but it holds important information with respect to biodiversity during the Griesbachian<sup>2,6</sup>, and so is included as a site in the discussion of anoxia.

Slope deposits of the Sumeini group (site 3) extend from the middle Permian to the Cretaceous and are separated in two contiguous sections; Wadi Maqam and Wadi Shuyab (Supplementary Figs. 2 and 3). Deposits include cherty dolomudstone of the late Permian, red to yellow marls, silts and shales around the PTB and platy limestones and shales for the Early Triassic<sup>1</sup>. The second section for the middle slope Sumeini group is Wadi Shuyab (Supplementary Fig. 3) that represents a continuation of the Maqam section. Sedimentation rates increased significantly here leading to an expanded Smithian of ~900m and hence lower resolution sampling. Additionally these sections include slump and breccia deposits linked to regional tectonic activity.

Early Triassic distal slope deposits (site 4) come from two sections; Wadi Wasit South (Supplementary Fig. 4) for the Late-Dienerian to mid-Smithian<sup>1</sup> and Radio Tower for the mid-Smithian to Early-Spathian (Supplementary Fig. 5). They represent distal turbidite deposits of platy limestones and shales with no bioturbation.

The Alwa Formation in the Ba'id Exotic (site 5, Supplementary Fig. 6) was deposited on an isolated carbonate platform, situated on a tilted block of the Gondwana margin<sup>7</sup>. Shallow-water carbonate platform deposits occurred from the Wordian to the Wuchiapingian. The block was exposed during the early Induan and resubmerged due to tectonic activity in the late Induan. Subsequently, pelagic ammonoid bearing limestones were deposited. The Alwa Fm. also contains numerous unusual carbonate fabrics, including thrombolites, microbialites, botryoidal calcite (*Frutexites*) and isopachous calcite cements (*Stromatactis*)<sup>8</sup>.

Buday'ah (site 6) represents one of the deepest basinal deposits of the Neo-Tethys for the Permian-Triassic period<sup>3</sup>. Formation ages have been refined owing to new biostratigraphic correlations from this study, but remain poorly resolved (Supplementary Fig. 7). Red pelagic cephalopod-bearing limestones were deposited onto basement basalt during the Wordian, followed by radiolarian cherts during the Wuchiapingian and mixed carbonate/clastic shales from the Changsingian to the Spathian. Unconformities are present between the Wordian and Wuchiapingian, in the mid-Dienerian, and at the end-Smithian.



### ***Supplementary Note 2: Dilution of $Fe_{HR}$***

In turbidite settings high sedimentation rates can cause a dilution of  $Fe_{HR}$ <sup>9,10</sup> and thus decrease of the  $Fe_{HR}/Fe_T$  ratio of sediments deposited under an anoxic water column, giving a falsely oxic signal. The mid-slope setting at Sumeini is a turbidite settings, with high sedimentation rate mainly during the mid to late Smithian. Dilution of  $Fe_{HR}$  could potentially cause the low  $Fe_T$  samples in this section, however they often occur with bioturbation suggesting that the low  $Fe_T$  might simply be a consequence of oxic deposition (Supplementary Fig. 1 and 2). The distal-slope settings of the Hawasina group (Wadi Wasit South and Radio Tower) represent distal turbidite environments, which could potentially suffer from such  $Fe_{HR}$  dilutions. In the  $Fe_{HR}/Fe_T$  data (Supplementary Figs. 4 and 5) subtle trends can be seen at decimeter scale that may reflect such changes in sedimentation rate. The dominance of high  $Fe_{HR}/Fe_T$  ratios suggests that sedimentation rates were not high enough to create long periods of falsely oxic signatures.

### ***Supplementary Note 3: Oxidative Weathering***

Although we took great care to sample well-preserved rocks, including removing rock surfaces prior to crushing, due to the use of outcrop material here, samples may have potentially been affected by oxidative weathering. However, the majority of shale samples are olive grey with no evidence of Fe oxide staining, suggesting minimal oxidation. The anoxic limestone samples sometimes show a pervasive red to orange coloration that might suggest oxidative weathering. However, such a colouration might also be expected for limestones deposited under ferruginous conditions. We nevertheless consider the possibility for oxidation in more detail. Firstly, it should be noted that pyrite and  $Fe_{carb}$  minerals, such as siderite, are the dominant  $Fe_{HR}$  minerals that may undergo oxidation. In both cases, however, oxidation will not significantly impact  $Fe_{HR}/Fe_T$  or  $Fe/Al$  ratios, and hence any interpretation of anoxia remains robust. Oxidation of siderite would transfer  $Fe_{carb}$  to the  $Fe_{ox}$  pool, and hence this would not affect identification of a ferruginous or euxinic signal. A robust euxinic signature is identified by  $Fe_{py}/Fe_{HR}$  ratios  $>0.7-0.8$ <sup>10,11</sup> and oxidative weathering has the potential to significantly decrease this ratio by transferring  $Fe_{py}$  to  $Fe_{ox}$ . If we consider an extreme and highly unlikely scenario,

whereby there was no  $\text{Fe}_{\text{ox}}$  in the primary sample, and all  $\text{Fe}_{\text{py}}$  has been oxidized to  $\text{Fe}_{\text{ox}}$ , with no oxidation of  $\text{Fe}_{\text{carb}}$  to  $\text{Fe}_{\text{ox}}$ , approximately 46% of the anoxic samples would give a euxinic signal. However,  $\text{Fe}_{\text{carb}}$  occurs in 97% of the anoxic samples, indicating that the rocks have not been completely weathered, and hence this extreme scenario is unlikely. The substantial contribution of  $\text{Fe}_{\text{carb}}$  further supports the interpretation of incomplete oxidation as does the fact we were able to analyze  $\delta^{34}\text{S}_{\text{pyrite}}$  in many samples. Therefore more than 50% of the anoxic samples demonstrate unequivocal deposition under ferruginous conditions, and this proportion was likely much higher. While it seems unlikely that a significant proportion of our samples were deposited under euxinic conditions, we cannot rule out the possibility of sporadic euxinia. Nevertheless, our data strongly indicate that anoxia was characterized, mostly, and potentially entirely, by ferruginous conditions.

#### ***Supplementary Note 4: Dolomitization***

Clarkson et al.<sup>12</sup> explore the role of late stage dolomitization on Fe-speciation data using samples from the Sumeini Early Triassic section (Site 3), where an oblique dolomitization front cross-cuts the outcrop. Comparison between contemporaneous limestones and dolomites demonstrate a general increase in  $\text{Fe}_{\text{T}}$  within the dolomites, predominantly present as  $\text{Fe}_{\text{carb}}$  and consistent with late stage alteration due to a through-flowing Fe-rich dolomitizing fluid. The effect of late stage dolomitization is very heterogeneous within a single bed, resulting in some samples with  $\text{Fe}_{\text{T}}$  enrichments and others with depletions. Either way, the  $\text{Fe}_{\text{HR}}/\text{Fe}_{\text{T}}$  ratio will be affected and thus we avoided sampling late stage dolomites.

All analysed carbonate samples presented here are from limestones and early dolomites. Early stage dolomitization does not cause an increase in  $\text{Fe}_{\text{T}}$  due to the lack of Fe-rich dolomitizing fluid in shallow burial environment<sup>12</sup>. Early dolomites tend to show very low  $\text{Fe}_{\text{T}}$  values of <0.5 wt% suggesting they record the low original  $\text{Fe}_{\text{T}}$  values typical of oxic carbonates<sup>12</sup>. Some dolomitized marls in the Saiq Plateau anoxic interval

(Supplementary Fig. 2) show similarly high  $\text{Fe}_T$  values and  $\text{Fe}_{\text{HR}}/\text{Fe}_T$  ratios to surrounding shales, suggesting that these represent primary signatures.

## Supplementary References

- 1 Richoz, S. Stratigraphie et variations isotopiques du carbone dans le Permien supérieur et le Trias inférieur de quelques localités de la Néothéthys (Turquie, Oman et Iran). *Memoires de Geologie (Lausanne)* **46**, 275, (2006).
- 2 Krystyn, L., Richoz, S., Baud, A. & Twitchett, R. J. A unique Permian-Triassic boundary section from the Neotethyan Hawasina Basin, Central Oman Mountains. *Palaeogeography Palaeoclimatology Palaeoecology* **191**, 329-344, (2003).
- 3 Baud, A., Richoz, S., Beauchamp, B., Cordey, F., Grasby, S., Henderson, C. M., Krystyn, L. & Nicora, A. The Buday'ah Formation, Sultanate of Oman: A Middle Permian to Early Triassic oceanic record of the Neotethys and the late Induan microsphere bloom. *Journal of Asian Earth Sciences* **43**, 130-144, (2012).
- 4 Koehrer, B., Zeller, M., Aigner, T., Poeppelreiter, M., Milroy, P., Forke, H. & Al-Kindi, S. Facies and stratigraphic framework of a Khuff outcrop equivalent: Saiq and Mahil formations, Al Jabal al-Akhdar, Sultanate of Oman. *GeoArabia* **15**, 91-156, (2010).
- 5 Algeo, T. J. & Twitchett, R. J. Anomalous Early Triassic sediment fluxes due to elevated weathering rates and their biological consequences. *Geology* **38**, 1023-1026, (2010).
- 6 Twitchett, R. J., Krystyn, L., Baud, A., Wheelley, J. R. & Richoz, S. Rapid marine recovery after the end-Permian mass-extinction event in the absence of marine anoxia. *Geology* **32**, 805-808, (2004).
- 7 Richoz, S., Baud, A., Beauchamp, B., Grasby, S., Henderson, C. & Krystyn, L. Khuff Margin: slope to oceanic deposits (Permian-Triassic Allochthons and Exotics, Oman) in *Permo-Triassic Sequence of the Arabian Plate* (ed M. Pöpperleiter) (EAGE Special Volume, 2014).
- 8 Woods, A. D. & Baud, A. Anachronistic facies from a drowned Lower Triassic carbonate platform: Lower member of the Alwa Formation (Ba'id Exotic), Oman Mountains. *Sedimentary Geology* **209**, 1-14, (2008).
- 9 Raiswell, R. & Canfield, D. E. Sources of iron for pyrite formation in marine sediments. *American Journal of Science* **298**, 219-245, (1998).
- 10 Poulton, S. W., Fralick, P. W. & Canfield, D. E. The transition to a sulphidic ocean similar to 1.84 billion years ago. *Nature* **431**, 173-177, (2004).
- 11 Poulton, S. W. & Canfield, D. E. Ferruginous Conditions: A Dominant Feature of the Ocean through Earth's History. *Elements* **7**, 107-112, (2011).
- 12 Clarkson, M. O., Poulton, S. W., Guilbaud, R. & Wood, R. Assessing the utility of Fe/Al and Fe-speciation to record water column redox conditions in carbonate-rich sediments. *Chemical Geology* **382**, 111-122, (2014).
